# Supplementary material for: Identification of Four New agr Quorum Sensing-Interfering Cyclodepsipeptides from a Marine Photobacterium
Source: PubMed Central journal article supplement (PMC3877902; doi:10.3390/md11125051), 2013-12-12
Supplement: marinedrugs-11-05051-s001.pdf [file marinedrugs-11-05051-s001.pdf]

## Supplementary Information

**Figure S1.** HPLC-UV chromatogram from final RP purification step (Gilson).

**Figure S2.** LC-UV-MS diode array chromatograms for ngercheumicin F–I.

**Figure S3.** Selected regions of ESI<sup>+</sup> mass spectra for purified ngercheumicin F–I.

**Figure S4.** <sup>1</sup>H NMR spectrum for ngercheumicin F.

**Figure S5.** DQF-COSY for ngercheumicin F.

**Figure S6.** Multiplicity edited gHSQC for ngercheumicin F.

**Figure S7.** gHMBC for ngercheumicin F.

**Figure S8.** <sup>1</sup>H NMR spectrum for ngercheumicin G.

**Figure S9.** <sup>13</sup>C NMR spectrum for ngercheumicin G.

**Figure S10.** DQF-COSY for ngercheumicin G.

**Figure S11.** Multiplicity edited gHSQC for ngercheumicin G.

**Figure S12.** gHMBC for ngercheumicin G.

**Figure S13.** <sup>1</sup>H NMR spectrum for ngercheumicin H.

**Figure S14.** <sup>13</sup>C NMR spectrum for ngercheumicin H.

**Figure S15.** DQF-COSY for ngercheumicin H.

**Figure S16.** Multiplicity edited gHSQC for ngercheumicin H.

**Figure S17.** gHMBC for ngercheumicin H.

**Figure S18.** <sup>1</sup>H NMR spectrum for ngercheumicin I.

**Figure S19.** <sup>13</sup>C NMR spectrum for ngercheumicin I.

**Figure S20.** DQF-COSY for ngercheumicin I.

**Figure S21.** Multiplicity edited gHSQC for ngercheumicin I.

**Figure S22.** gHMBC for ngercheumicin I.

**Figure S23.** Key HMBC and H2BC correlations in the fatty acid chain of Ngercheumicin F.

**Figure S24.** Northern blot results for ngercheumicin F–I.

**Figure S25.** Plate assay results in the colorimetric *S. aureus lacZ* reporter assay against *S. aureus* 8325-4.

**Table S1.** NMR table for ngercheumicin F.

**Table S2.** NMR table for Ngercheumicin G.

**Table S3.** NMR table for Ngercheumicin H.

**Table S4.** NMR table for Ngercheumicin I.

**Figure S1.** Detector response from HPLC purification of ngercheumicins, where fractions 6, 8, 9 and 11 gave ngercheumicin F, G, H and I, respectively. Fraction size is not shown, as these are pooled fractions from the automatic fractionation. Fraction 7 and 10 contains isomers of ngercheumicin F and H.

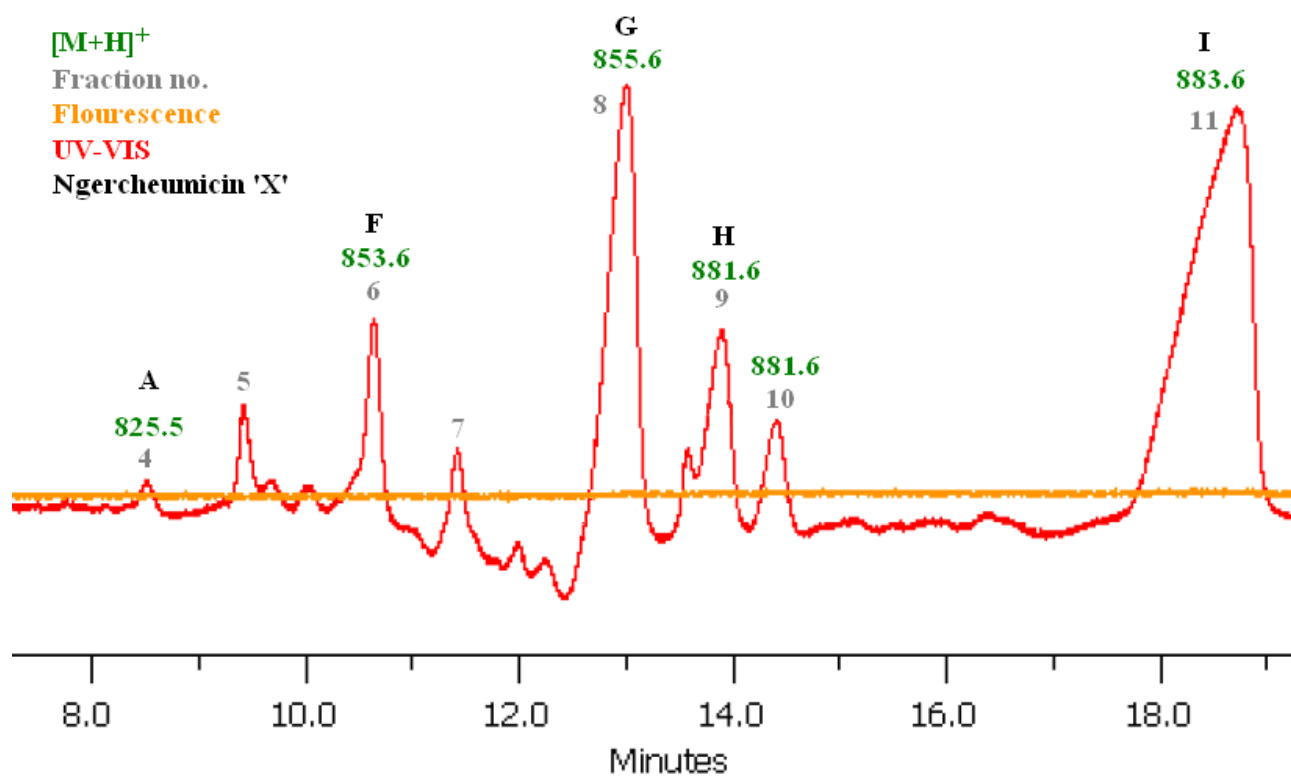

**Figure S2.** Diode array detected (200–700 nm) chromatograms for purified samples of ngercheumicin F, G, H and I (from the top).

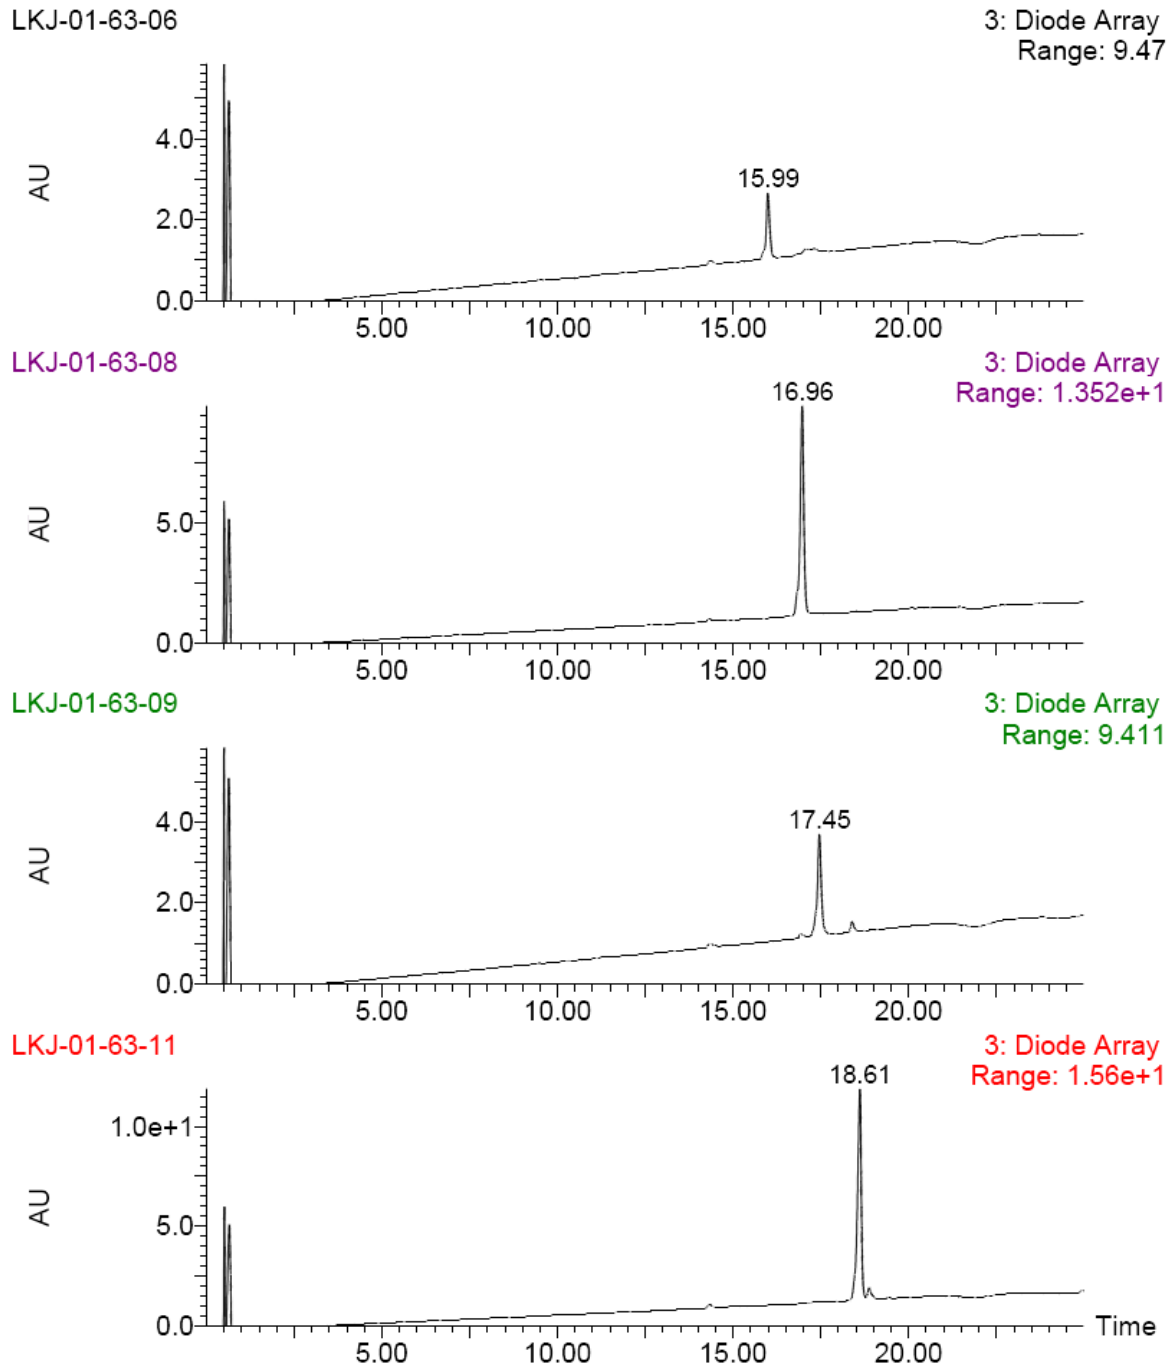

**Figure S3.** Selected region of the total ion chromatograms (TIC) of ngercheumicin F, G, H and I (from the top), showing  $[M + H]^+$ ,  $[M + NH_4]^+$  and weak  $[M + Na]^+$  adducts. Outside the range are also  $[2M + NH_4]^+$  at  $m/z$  1723–1784.

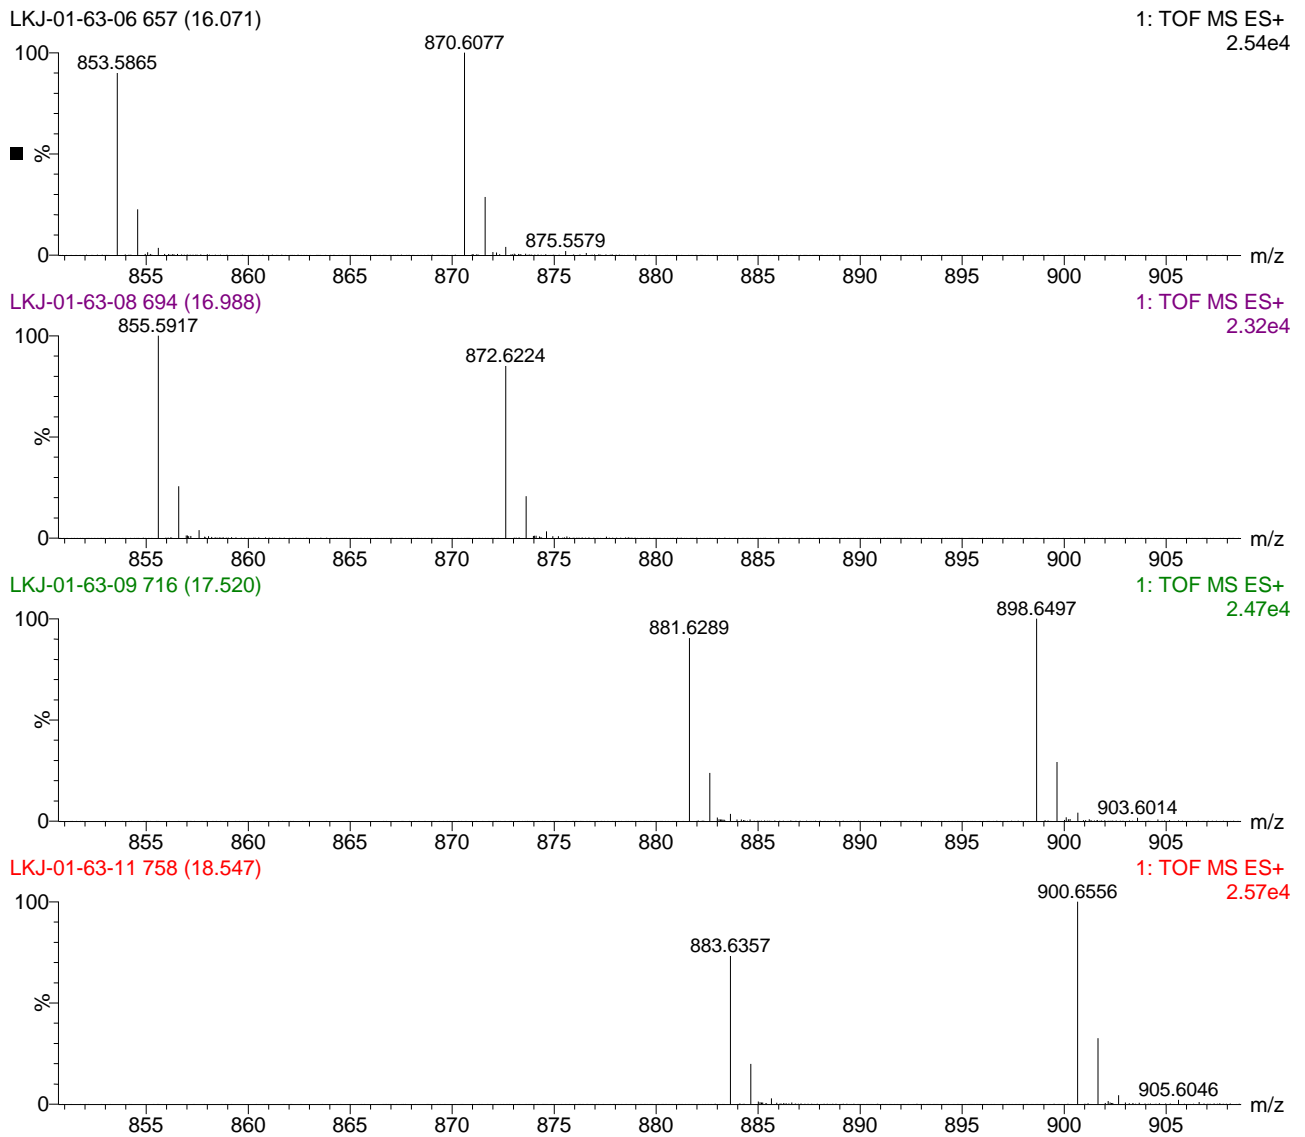

Figure S4.  $^1\text{H}$  spectrum for ngercheumicin F.

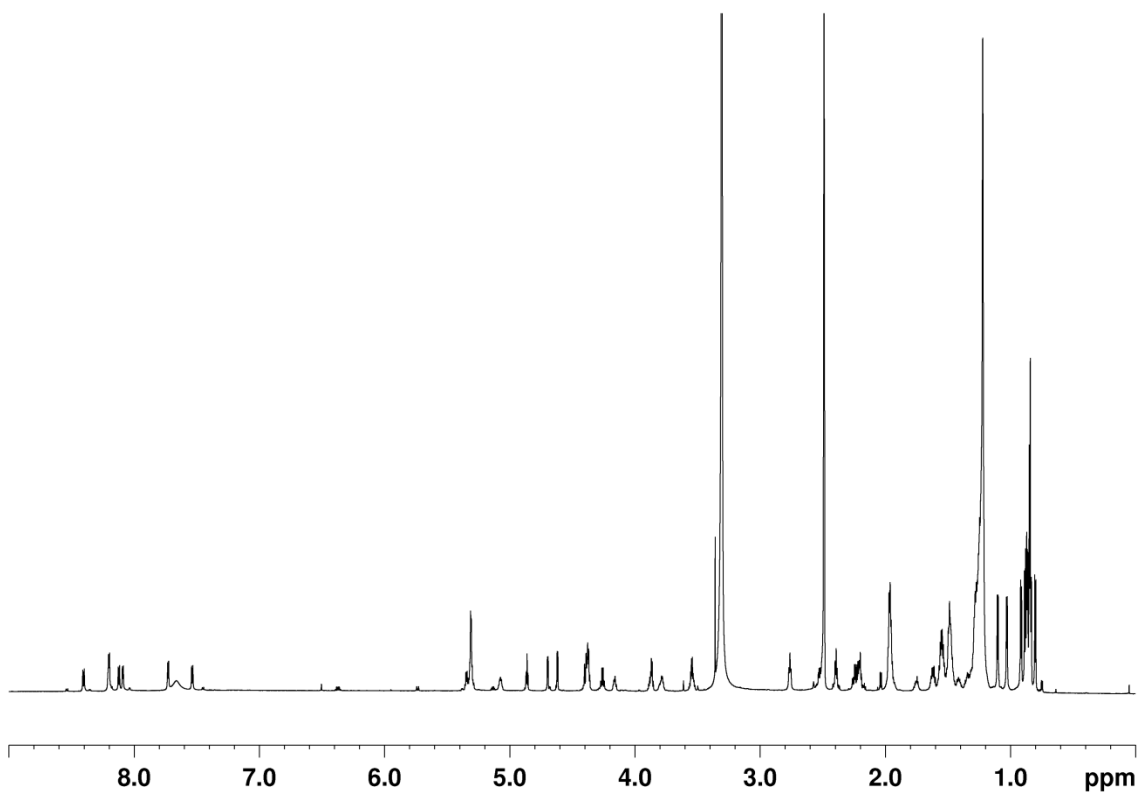

Figure S5. DQF-COSY for ngercheumicin F.

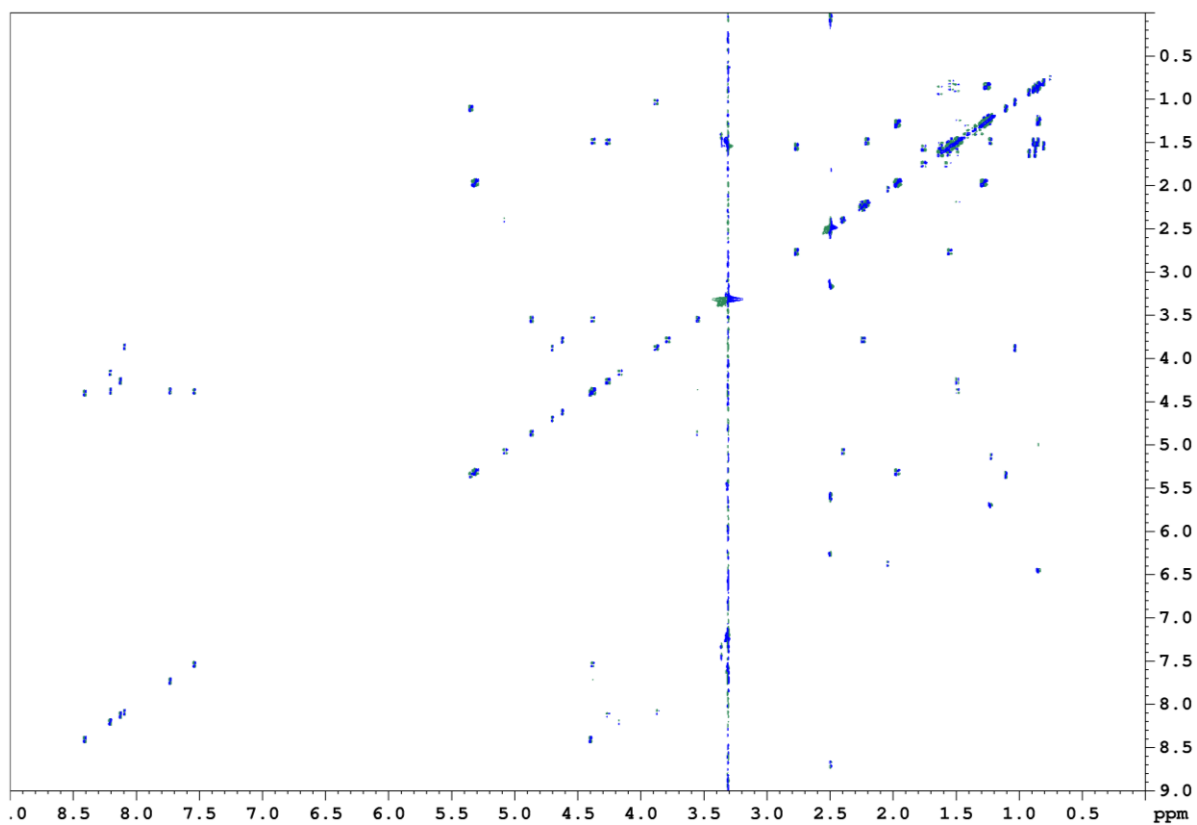

Figure S6. Multiplicity edited gHSQC for ngercheumicin F.

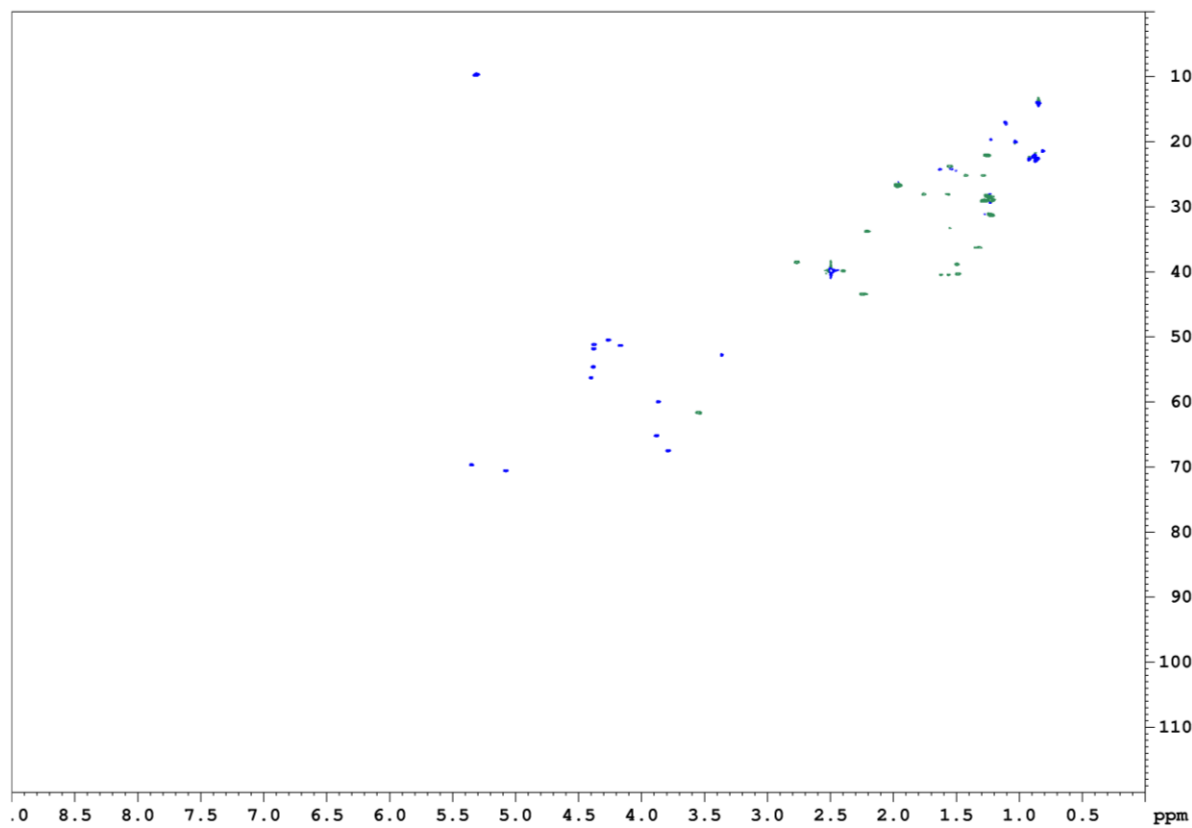

Figure S7. gHMBC for ngercheumicin F.

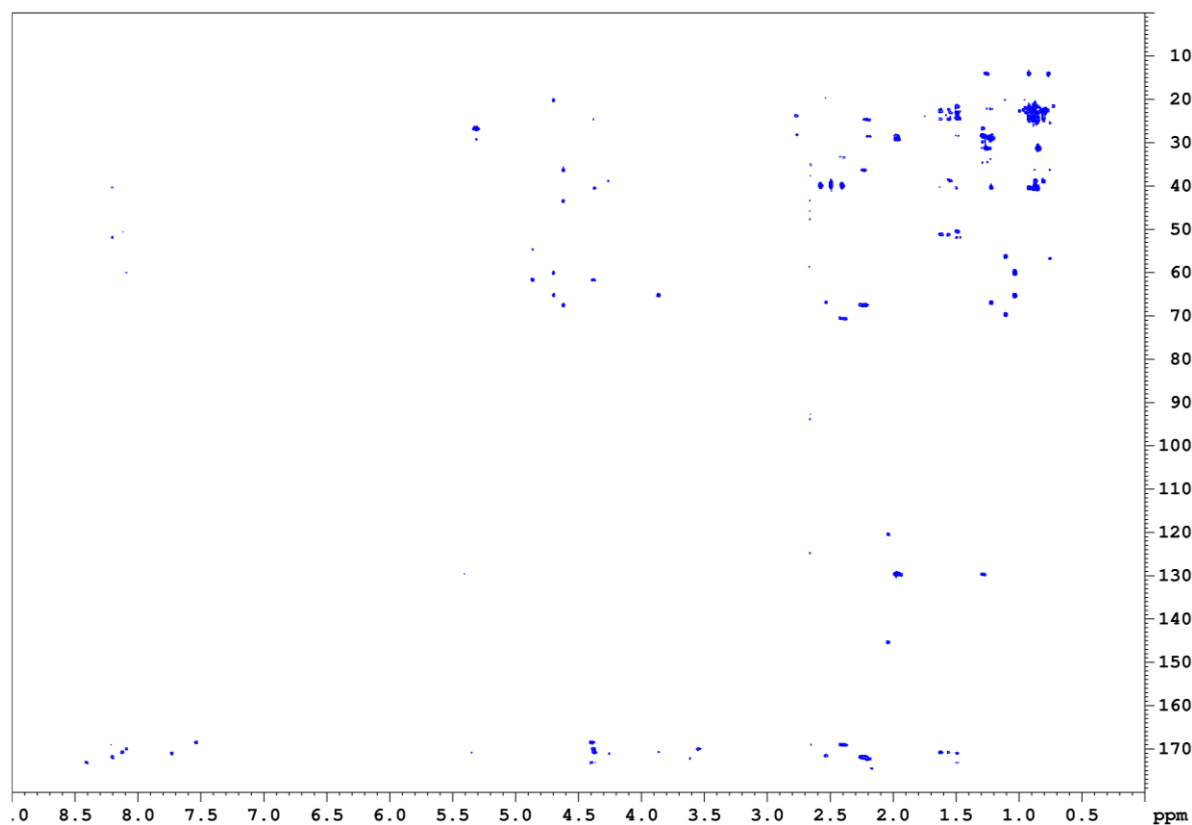

Figure S8.  $^1\text{H}$  spectrum for ngercheumicin G.

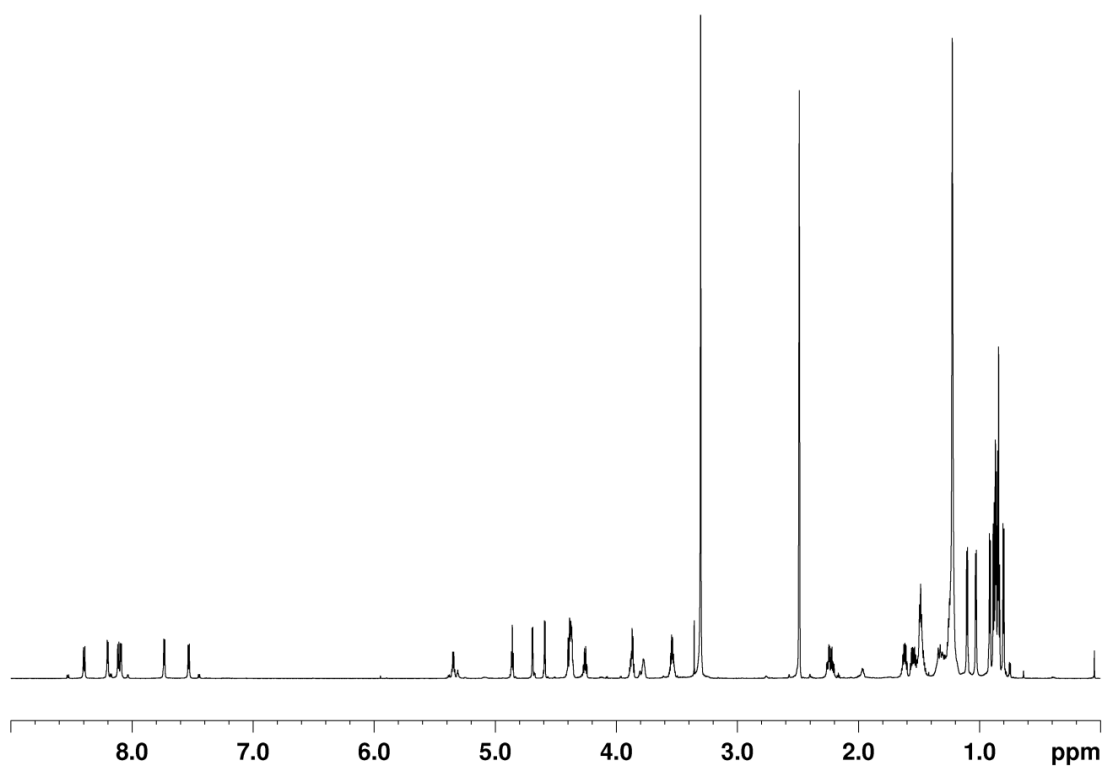

Figure S9.  $^{13}\text{C}$  spectrum for ngercheumicin G.

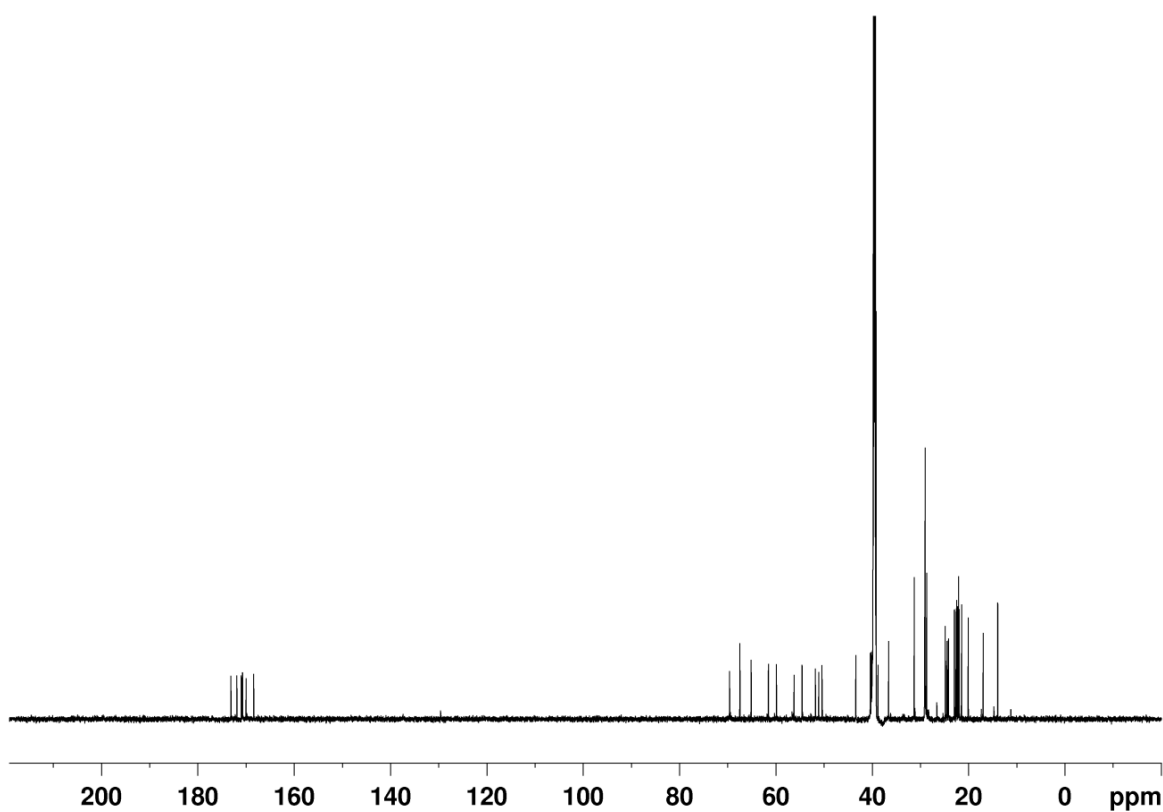

Figure S10. DQF-COSY for ngercheumicin G.

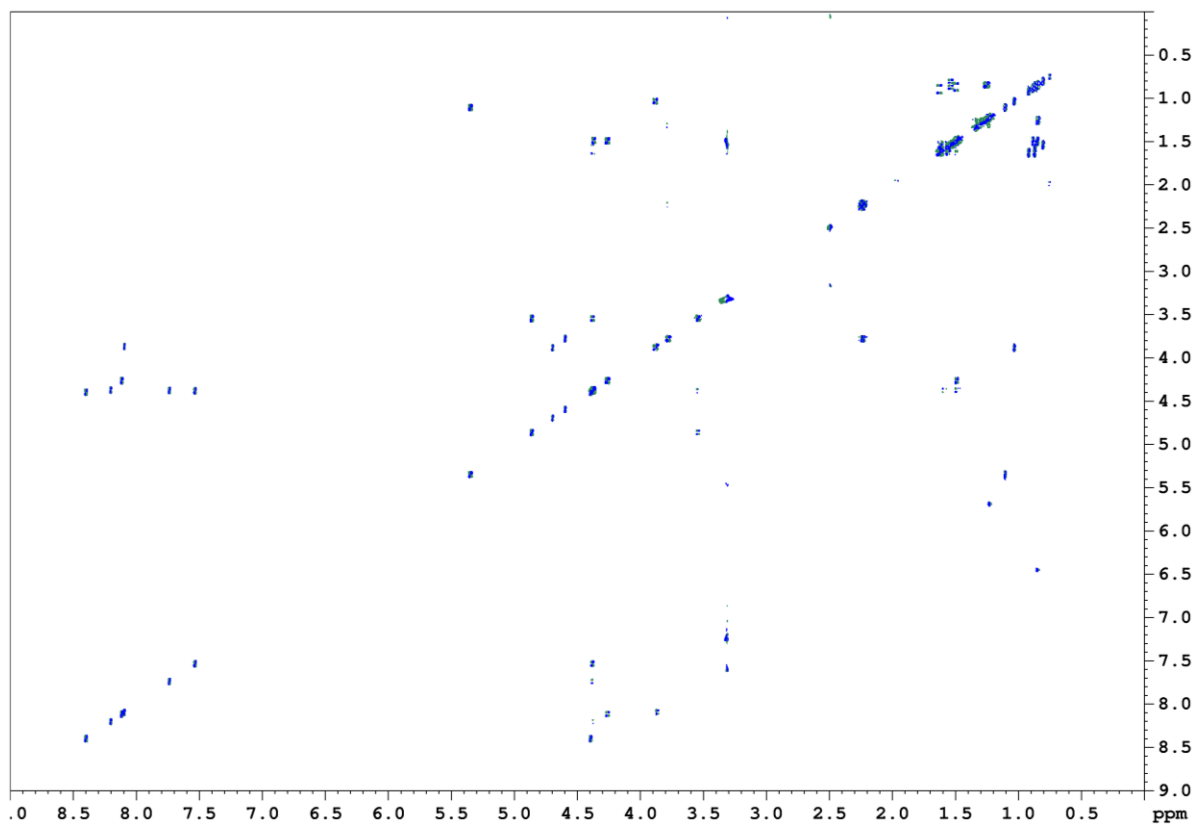

Figure S11. Multiplicity edited gHSQC for ngercheumicin G.

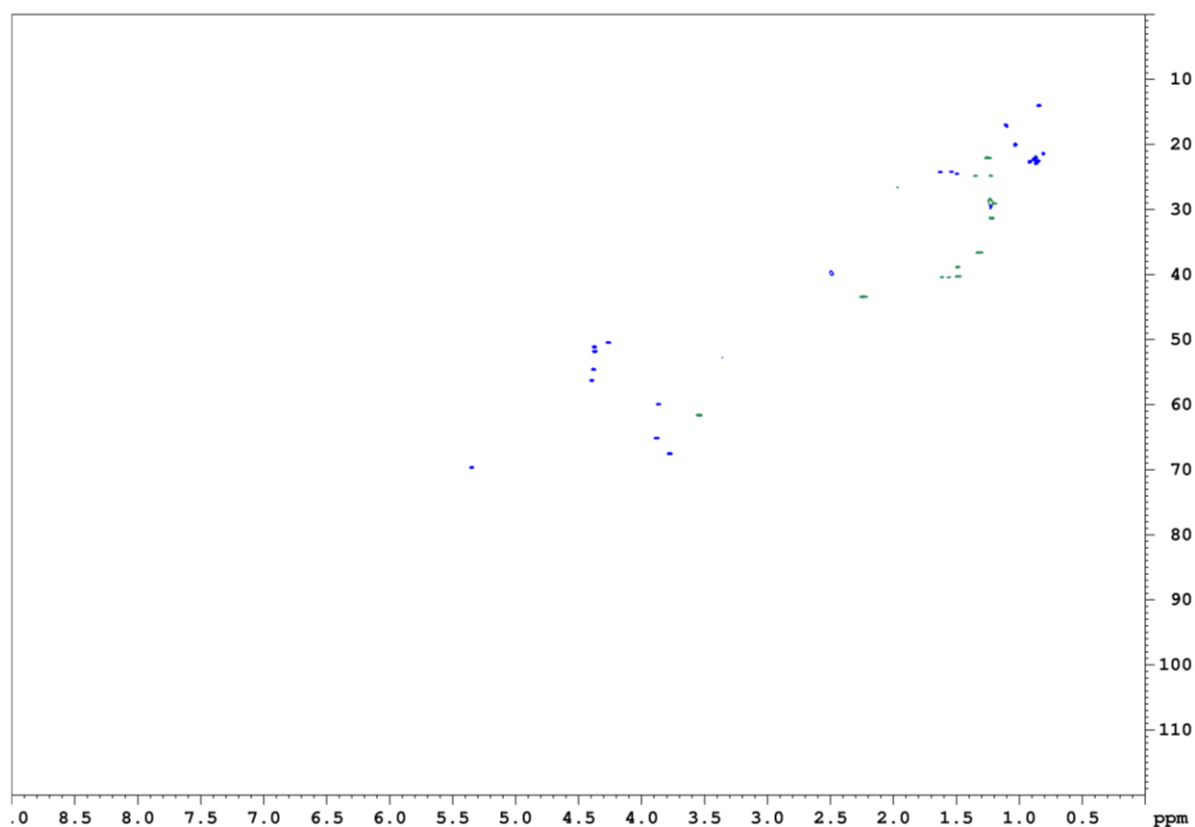



Figure S12. gHMBC for ngercheumicin G.

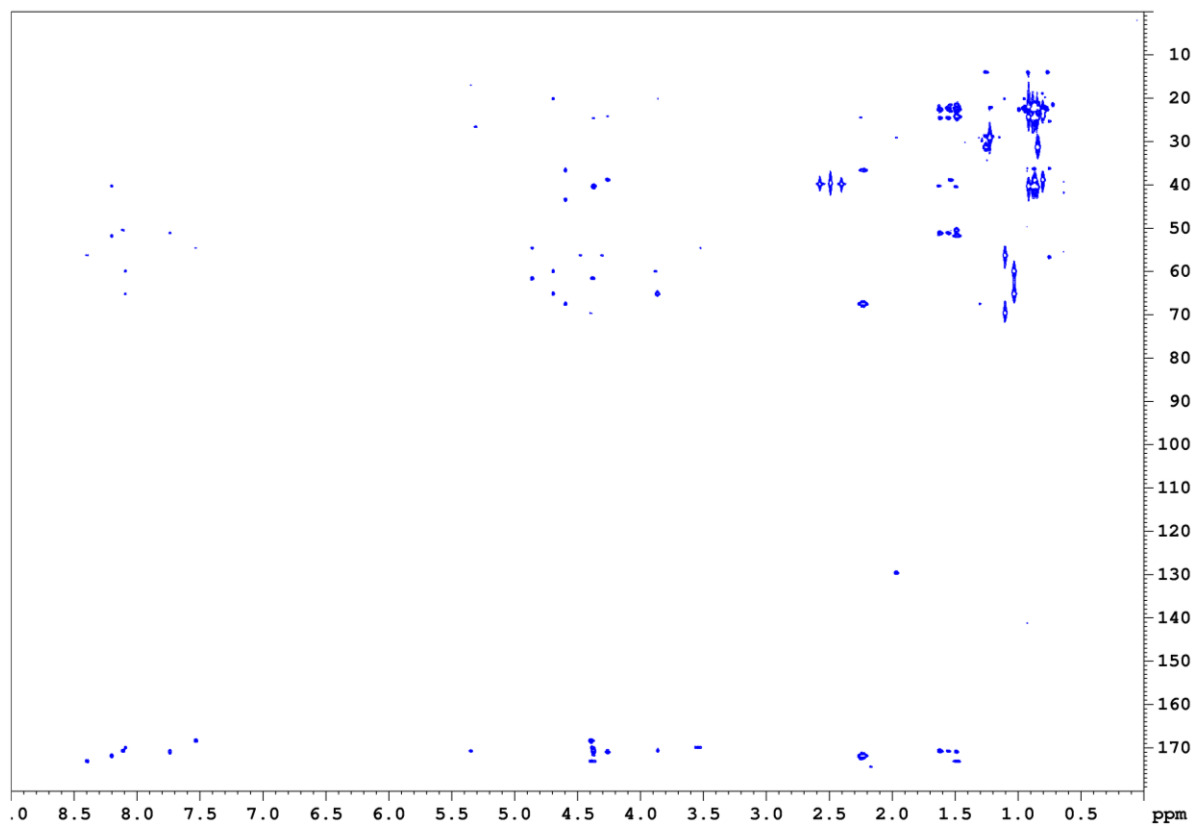

Figure S13.  $^1\text{H}$  spectrum for ngercheumicin H.

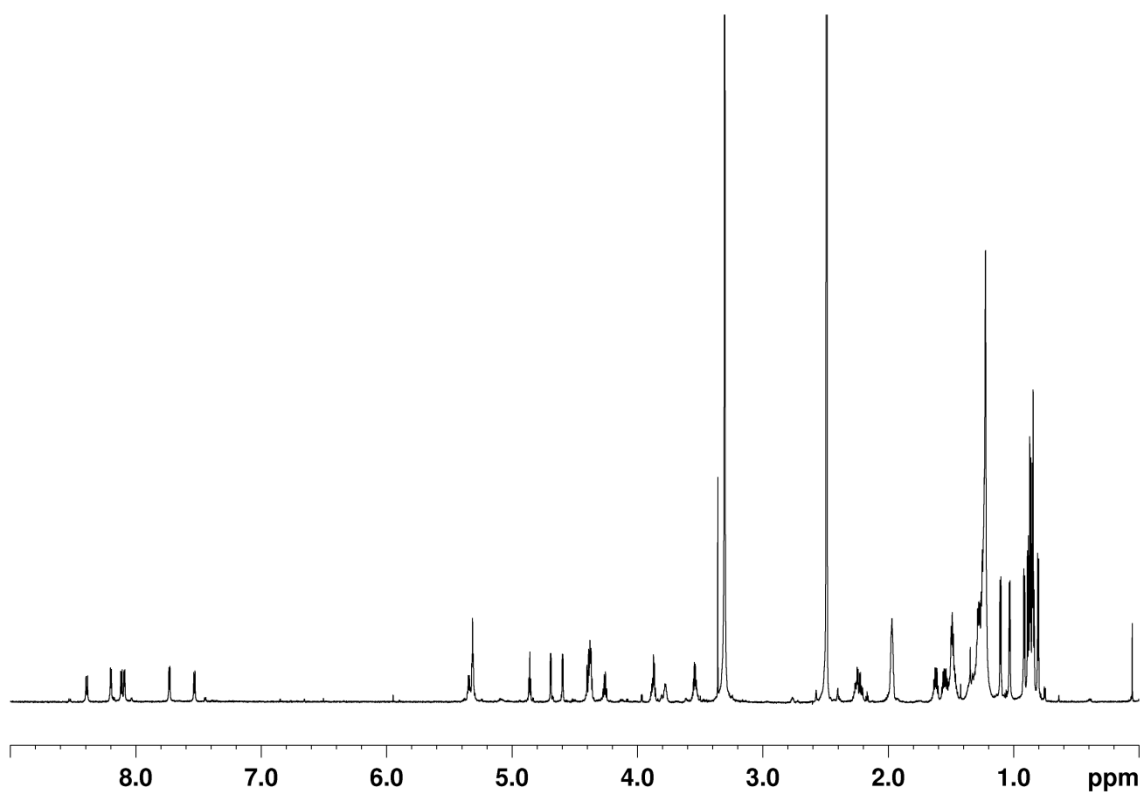

Figure S14.  $^{13}\text{C}$  spectrum for ngercheumicin H.

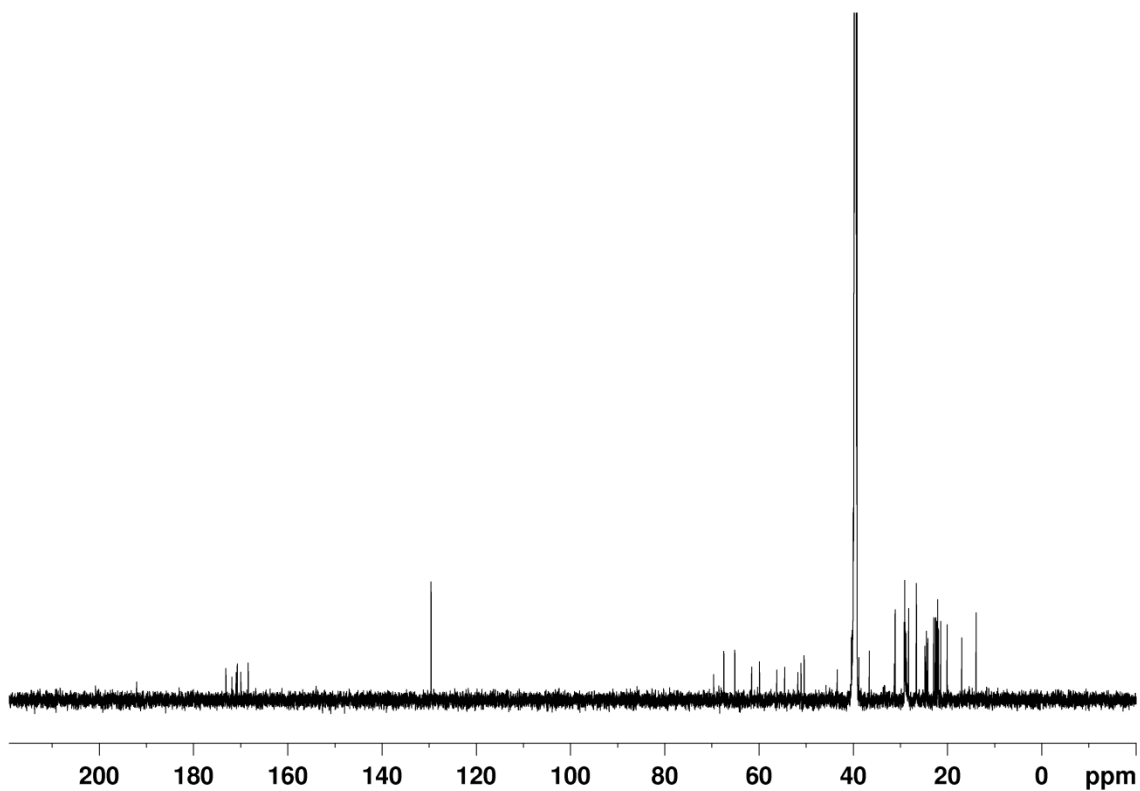

Figure S15. DQF-COSY for ngercheumicin H.

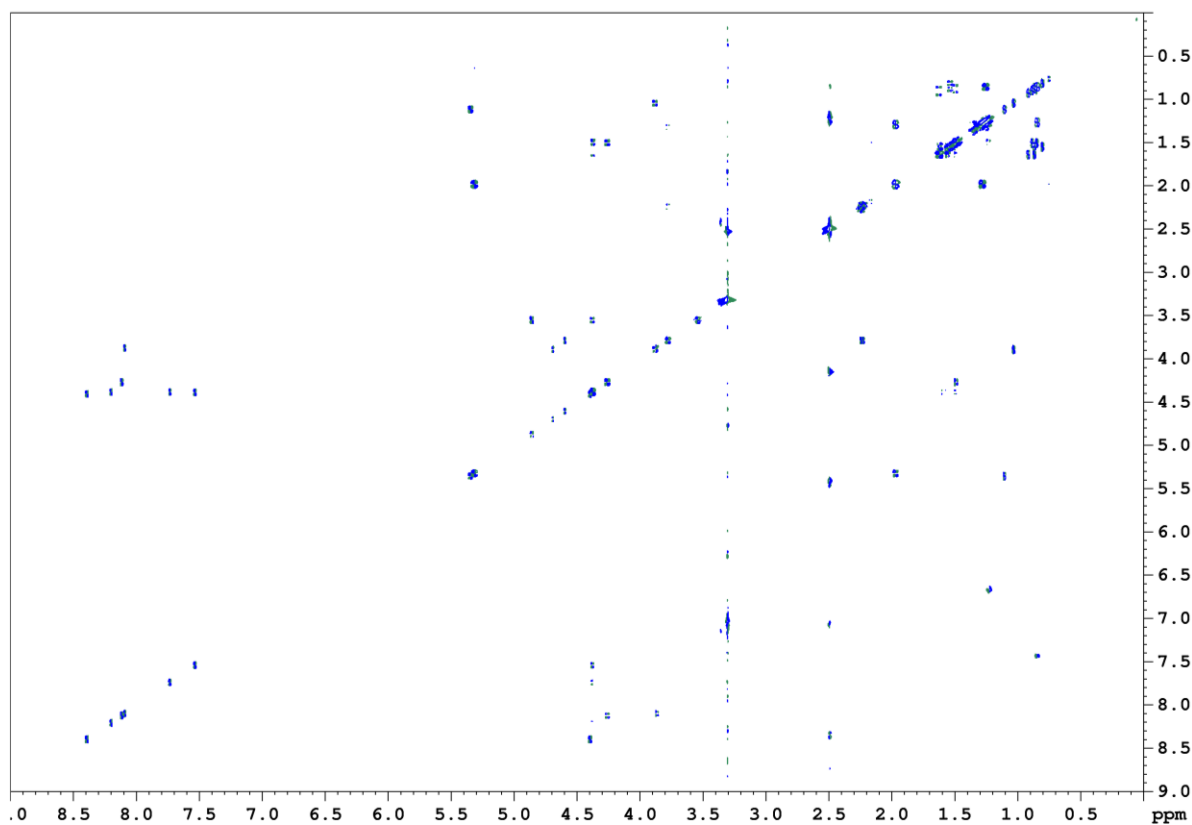

Figure S16. Multiplicity edited gHSQC for ngercheumicin H.

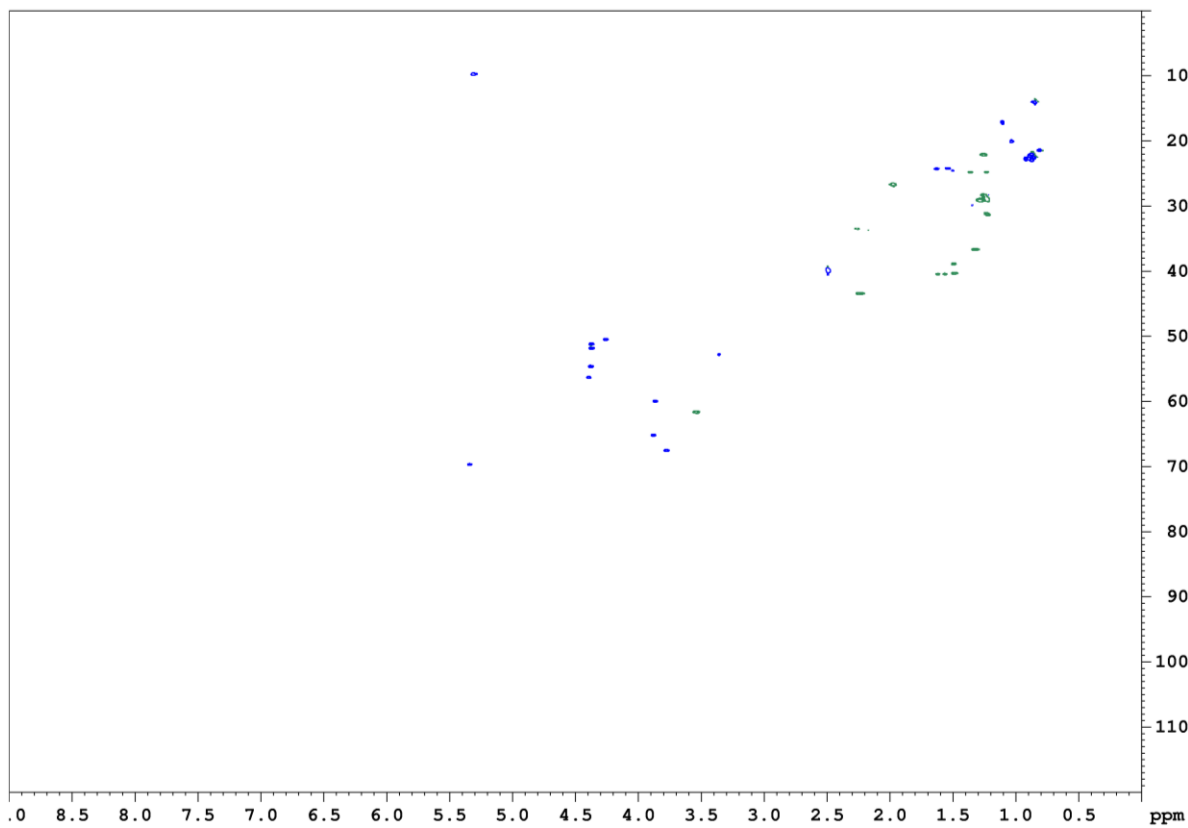

Figure S17. gHMBC for ngercheumicin H.

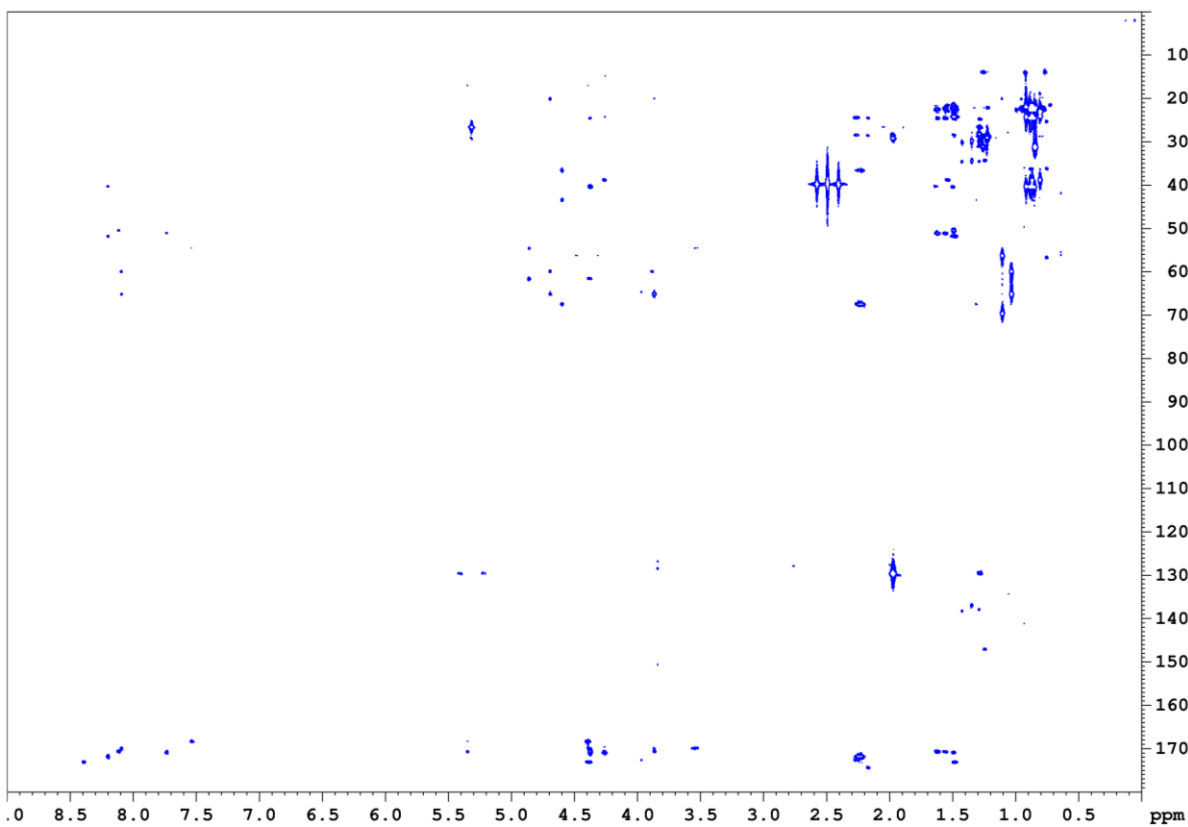

Figure S18.  $^1\text{H}$  spectrum for ngercheumicin I.

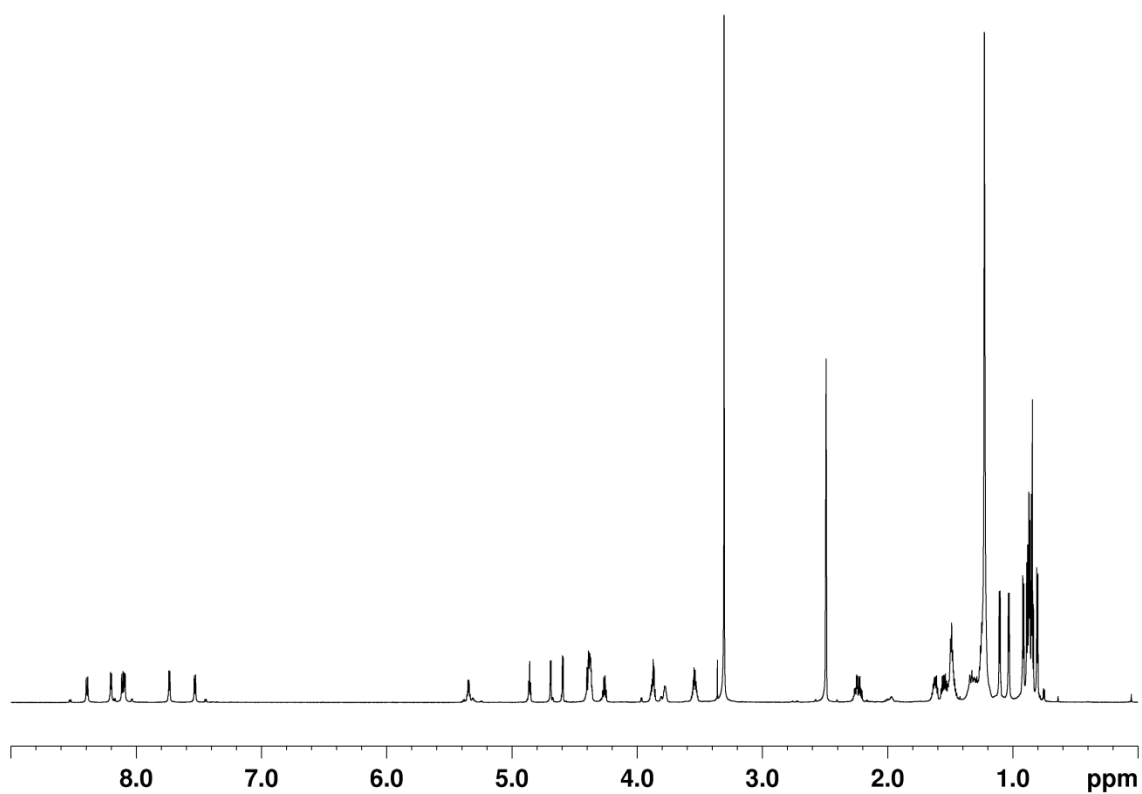

Figure S19.  $^{13}\text{C}$  spectrum for ngercheumicin I.

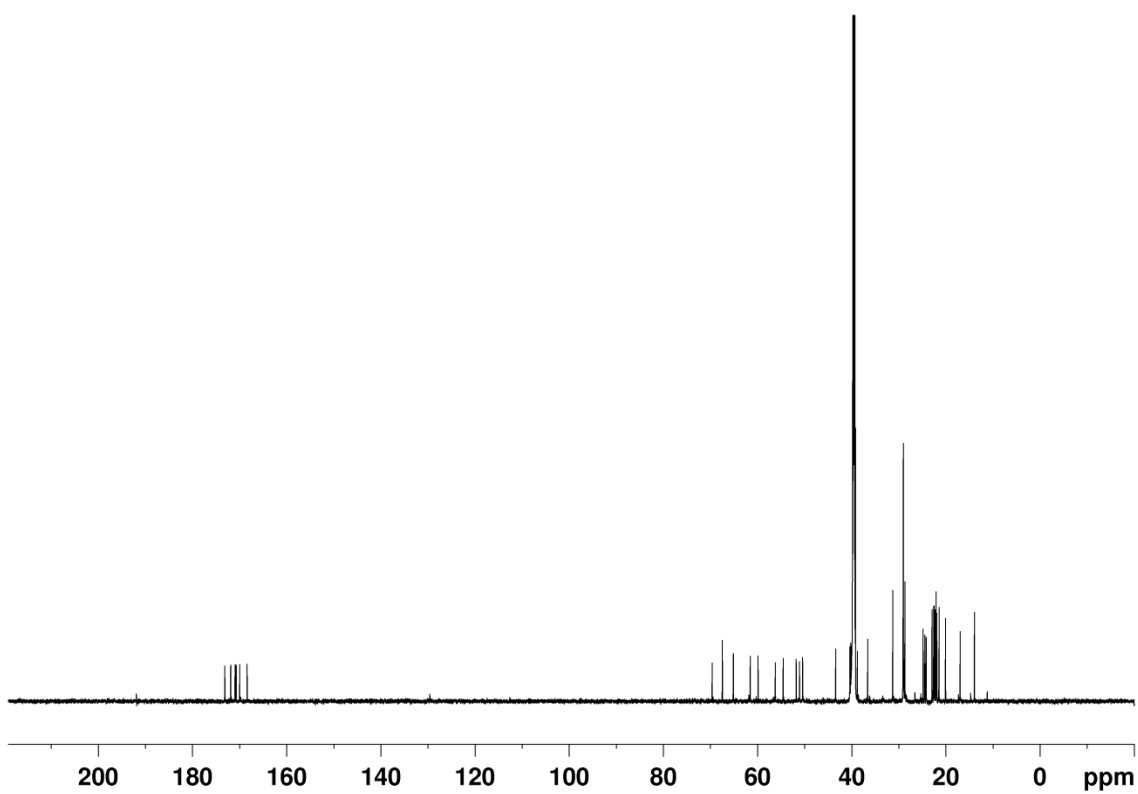

Figure S20. DQF-COSY for ngercheumicin I.

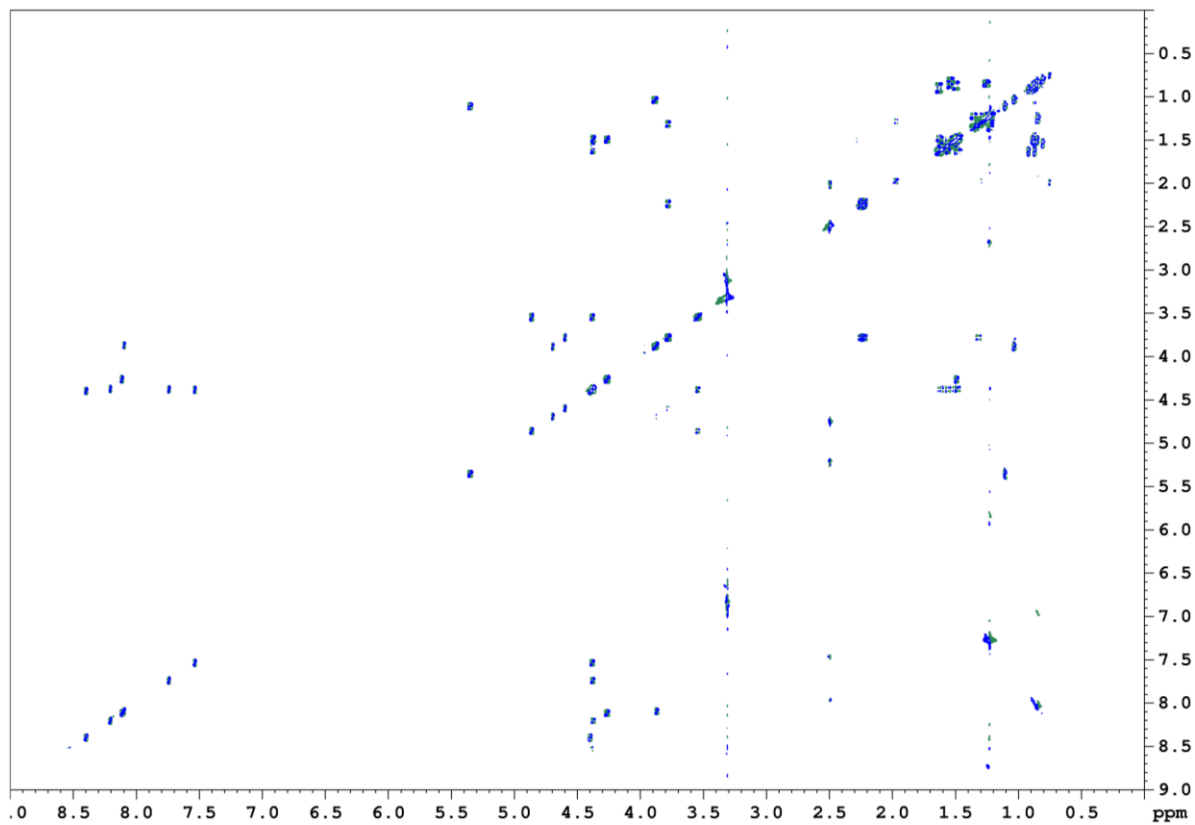

Figure S21. Multiplicity edited gHSQC for ngercheumicin I.

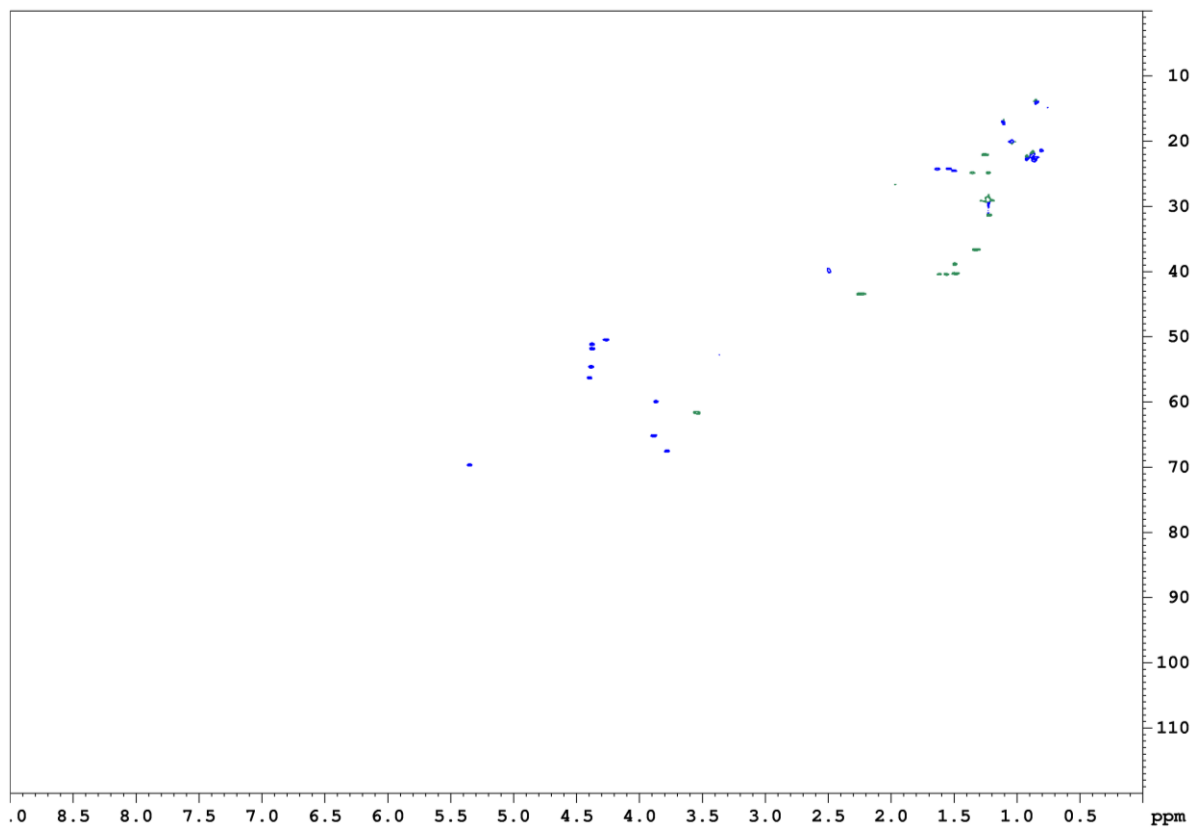

**Figure S22.** gHMBC for ngercheumicin I.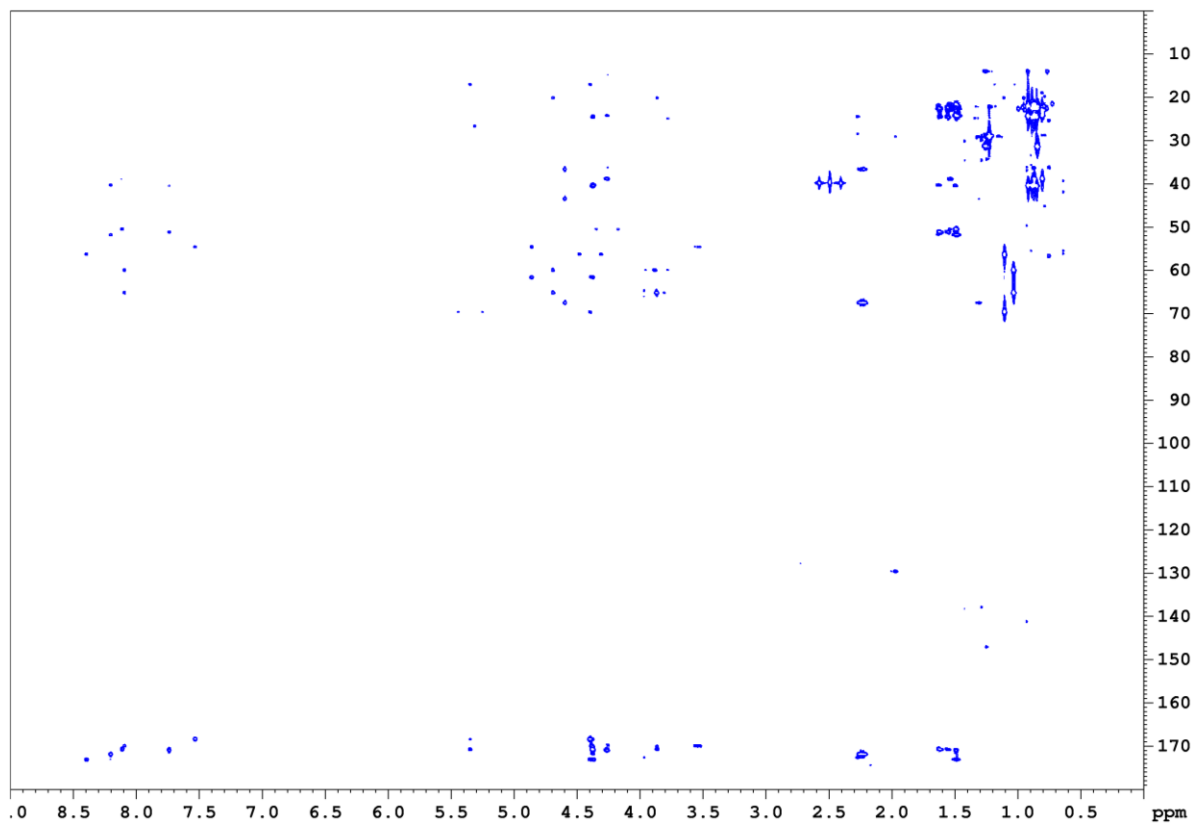**Figure S23.** Key HMBC and H2BC correlations in the fatty acid chain of Ngercheumicin F.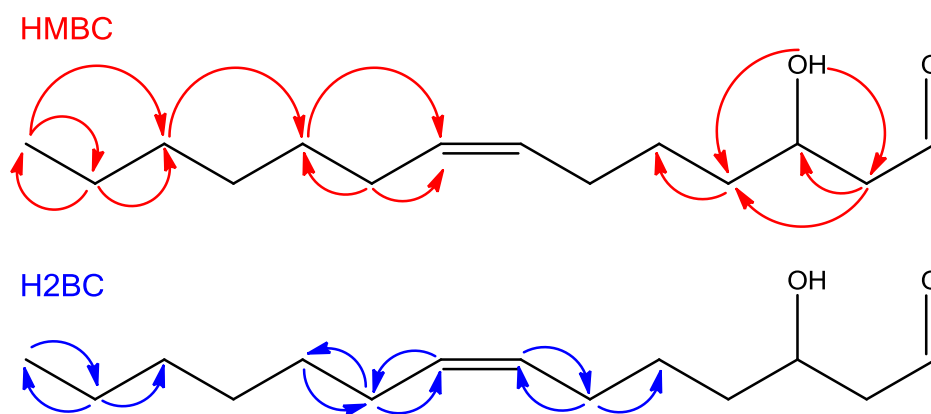

**Figure S24.** Northern blot results for ngercheumicin F, G, H and I in DMSO at 5 µg/mL ( $\approx 6 \mu\text{M}$ ) and 20 µg/mL ( $\approx 23 \mu\text{M}$ ) against *S. aureus* USA300/FPR3757 at  $\text{OD}_{600} = 0.8$  and  $\text{OD}_{600} = 3.0$ . DMSO is used as negative control.

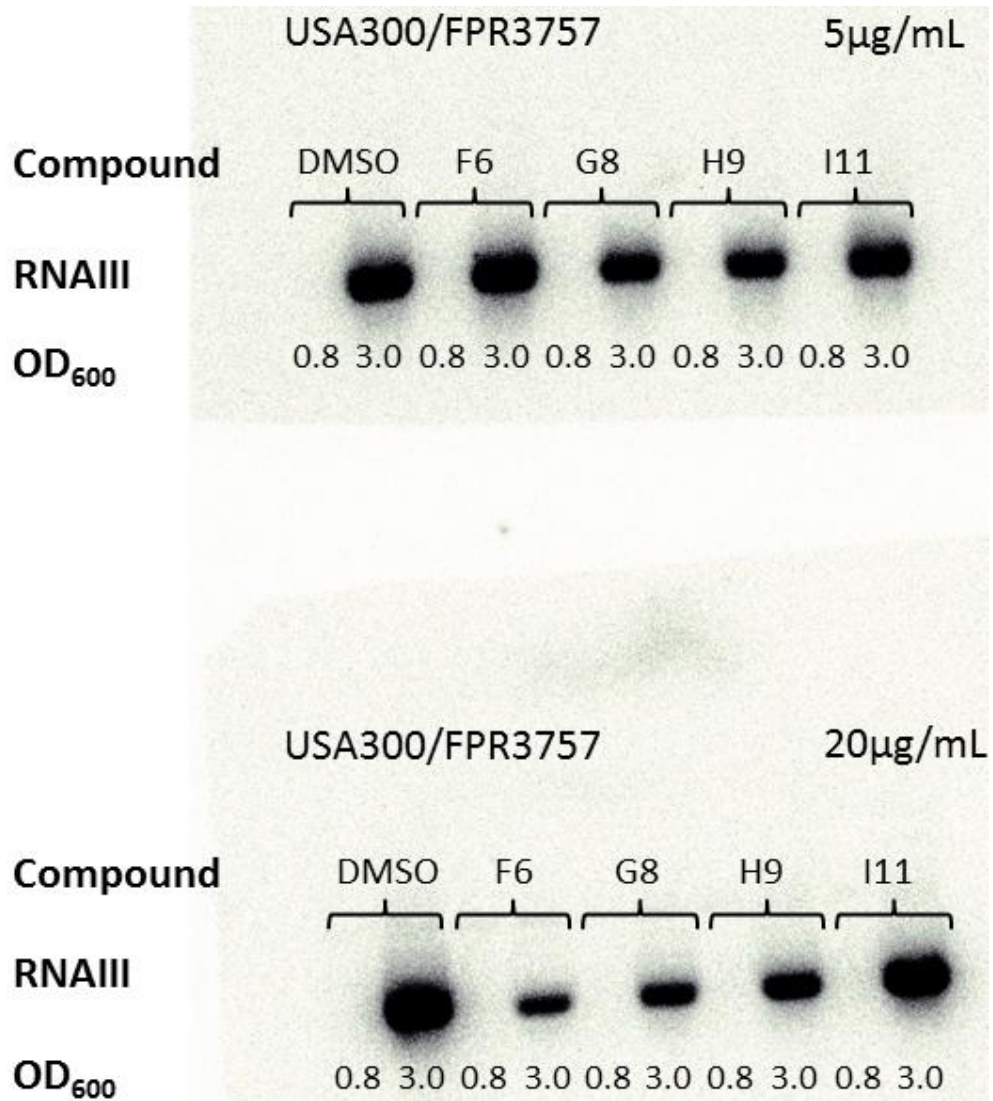

**Figure S25.** Plate assay results in the colorimetric *S. aureus lacZ* reporter assay with ngercheumicins F, G, H and I in DMSO at 1 mg/mL against *S. aureus* 8325-4. DMSO and water is used as negative controls. Inhibitors of the *agr* locus enhance transcription of *spa* and reduce expression of *hla* and *rnalIII*.

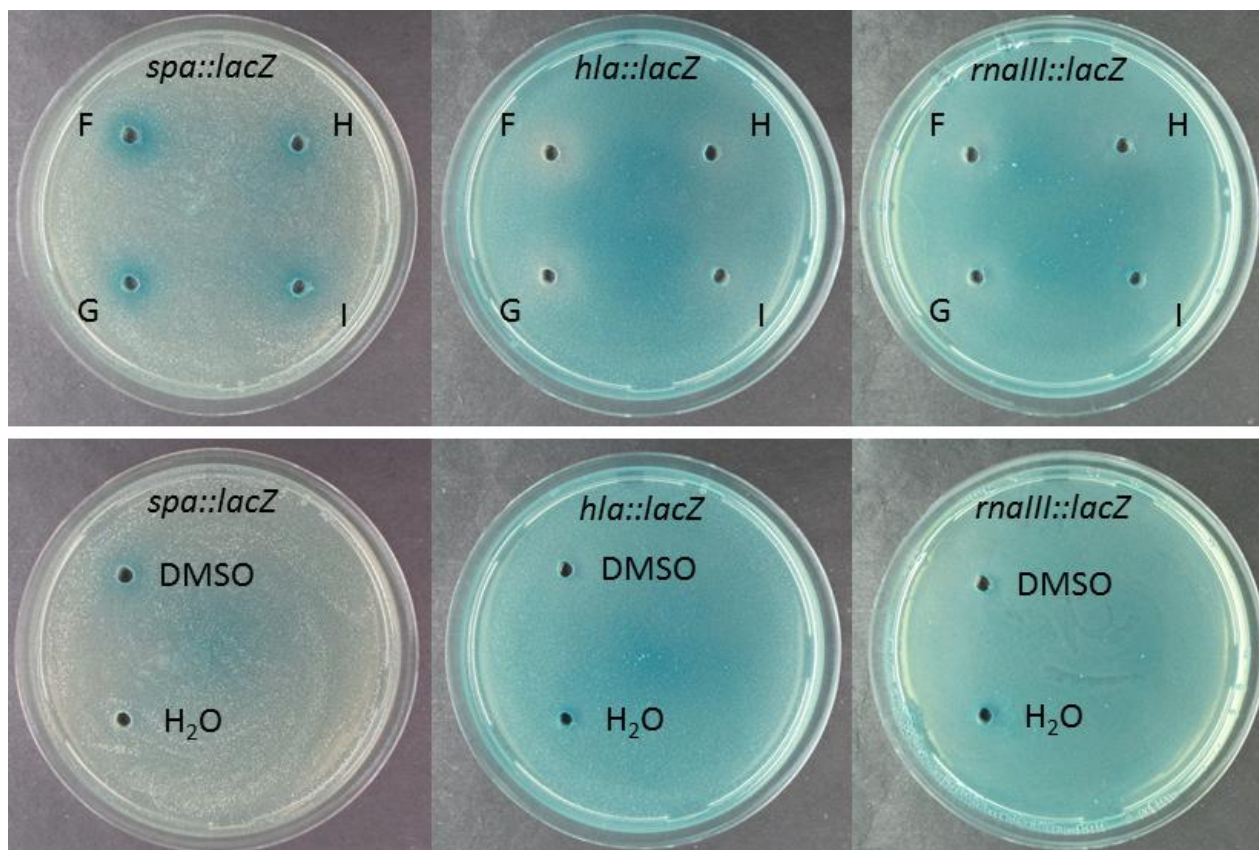

**Table S1.** NMR table for Ngercheumicin F.

| Position, Type                         | $\delta_H$ (ppm), #H, Multiplicity, J (Hz) | $\delta_C$ (ppm) | HMBC Connectivity | H2BC Connectivity |
|----------------------------------------|--------------------------------------------|------------------|-------------------|-------------------|
| <i>Leu</i> <sup>1</sup>                |                                            |                  |                   |                   |
| 1—CO                                   | —                                          | 170.8            | —                 |                   |
| 2—CH <sub><math>\alpha</math></sub>    | 4.37, 1H, m                                | 51.1             | 1, 3              |                   |
| 3—CH <sub><math>\beta</math></sub>     | 1.62, 1H, m<br>1.55, 1H, m                 | 40.4             | 1, 2, 4, 5, 6     |                   |
| 4—CH <sub><math>\gamma</math></sub>    | 1.49, 1H, m                                | 24.5             | 3                 |                   |
| 5—CH <sub><math>\delta_1</math></sub>  | 0.88, 3H, d, 6.5                           | 22.3             | 3, 4, 6           | 4                 |
| 6—CH <sub><math>\delta_2</math></sub>  | 0.85, 3H, d, 6.5                           | 22.5             | 3, 4, 5           | 4                 |
| 7—NH                                   | 7.73, 1H, d, 6.5                           | —                | (2), 8            | 2                 |
| <i>Leu</i> <sup>2</sup>                |                                            |                  |                   |                   |
| 8—CO                                   | —                                          | 171.0            | —                 |                   |
| 9—CH <sub><math>\alpha</math></sub>    | 4.26, 1H, q, 8.0                           | 50.4             | 8, 10             | 10                |
| 10—CH <sub><math>\beta</math></sub>    | 1.49, 2H, m                                | 38.8             | 9, 11, 13         | 9                 |
| 11—CH <sub><math>\gamma</math></sub>   | 1.53, 1H, m                                | 24.2             |                   | 10                |
| 12—CH <sub><math>\delta_1</math></sub> | 0.87, 3H, d, 6.5                           | 22.9             | 10, 11, 13        | 11                |
| 13—CH <sub><math>\delta_2</math></sub> | 0.80, 3H, d, 6.5                           | 21.4             | 10, 11, 12        | 11                |
| 14—NH                                  | 8.12, 1H, d, 8.5                           | —                | (9), 15           | 9                 |



Table S1. Cont.

|                                |                       |       |              |          |
|--------------------------------|-----------------------|-------|--------------|----------|
| <i>L-allo-Thr</i> <sup>1</sup> |                       |       |              |          |
| 15—CO                          | —                     | 170.7 | —            |          |
| 16—CH <sub>α</sub>             | 3.86, 1H, m           | 59.9  | 15, 17       | 17       |
| 17—CH <sub>β</sub>             | 3.88, 1H, m           | 65.1  | (16)         | 16, 18   |
| 17—OH                          | 4.70, 1H, d, 4.6      | —     | 16, 17, 18   | 17       |
| 18—CH <sub>γ</sub>             | 1.03, 3H, d, 6.0      | 20.0  | 16, 17       | 17       |
| 19—NH                          | 8.09, 1H, d, 6.0      | —     | (16), 20     | 16       |
| <i>D-Ser</i>                   |                       |       |              |          |
| 20—CO                          | —                     | 170.0 | —            |          |
| 21—CH <sub>α</sub>             | 4.38, 1H, m           | 54.5  | 20, 22, 24   | 22       |
| 22—CH <sub>β</sub>             | 3.54, 2H, m           | 61.6  | 20, (21)     | 21       |
| 22—OH                          | 4.86, 1H, t, 6.0      | —     | (21), 22     | 22       |
| 23—NH                          | 7.53, 1H, d, 8.0      | —     | 24           | 21       |
| <i>L-allo-Thr</i> <sup>2</sup> |                       |       |              |          |
| 24—CO                          | —                     | 168.4 | —            |          |
| 25—CH <sub>α</sub>             | 4.40, 1H, d, 9.0      | 56.2  | 24, 29       |          |
| 26—CH <sub>β</sub>             | 5.35, 1H, qd, 6.0, <1 | 69.6  | 1            | 27       |
| 27—CH <sub>γ</sub>             | 1.10, 3H, d, 6.5      | 17.0  | 25, 26       | 26       |
| 28—NH                          | 8.40, 1H, d, 9.5      | —     | 29           | 25       |
| <i>Leu</i> <sup>3</sup>        |                       |       |              |          |
| 29—CO                          | —                     | 173.1 | —            |          |
| 30—CH <sub>α</sub>             | 4.37, 1H, m           | 51.7  | 29, 31       | 31       |
| 31—CH <sub>β</sub>             | 1.48, 2H, m           | 40.3  | 29, 30, 32   |          |
| 32—CH <sub>γ</sub>             | 1.62, 1H, m           | 24.2  | 33           |          |
| 33—CH <sub>δ,1</sub>           | 0.92, 3H, d, 6.5      | 22.6  | 31, 32, 34   | 32       |
| 34—CH <sub>δ,2</sub>           | 0.87, 3H, d, 6.5      | 21.9  | 31, 32, 33   | 32       |
| 35—NH                          | 8.20, 1H, d, 6.5      | —     | 30, 31, 36   | 30       |
| <i>Fatty acid</i>              |                       |       |              |          |
| 36—CO                          | —                     | 171.8 | —            |          |
| 37                             | ~2.24, 2H, m          | 43.3  | 36, 38, (39) | 38       |
| 38                             | 3.78, 1H, m           | 67.4  |              | 37       |
| 38—OH                          | 4.62, 1H, d, 5.0      | —     | 37, 38, 39   | 38       |
| 39                             | 1.34, 1H, m           | 36.2  | (38), 40     | (38), 40 |
|                                | 1.30, 1H, m           |       |              |          |
| 40                             | 1.42, 1H, m           | 25.1  | 41, 42       | 41       |
|                                | 1.28, 1H, m           |       |              |          |
| 41                             | 1.96, 2H, m           | 26.6  | 43           | (40), 42 |
| 42                             | 5.31, 1H, m           | 129.6 | 44           | 41, 43   |
| 43                             | 5.31, 1H, m           | 129.6 | 43           | 42, 44   |
| 44                             | 1.96, 2H, m           | 26.5  | 42           | 43, 45   |
| 45                             | 1.28, 2H, m           | 29.0  |              | 44       |
| 46                             | 1.24, 2H, m           | 28.3  |              | 47       |
| 47                             | 1.22, 2H, m           | 31.1  | 45           | 46       |
| 48                             | 1.25, 2H, m           | 22.1  | 47, 49       | 47, 49   |
| 49                             | 0.84, 3H, t, 7.0      | 13.9  | 47, 48       | 48       |

Table S2. NMR table for Ngercheumicin G.

| Position, Type                         | $\delta_{\text{H}}$ (ppm), #H, Multiplicity, J (Hz) | $\delta_{\text{C}}$ (ppm) | HMBC Connectivity | H2BC Connectivity |
|----------------------------------------|-----------------------------------------------------|---------------------------|-------------------|-------------------|
| <i>Leu</i> <sup>1</sup>                |                                                     |                           |                   |                   |
| 1—CO                                   | —                                                   | 170.8                     | —                 |                   |
| 2—CH <sub><math>\alpha</math></sub>    | 4.37, 1H, m                                         | 51.1                      | 1, 3, 4, 8        | 3                 |
| 3—CH <sub><math>\beta</math></sub>     | 1.61, 1H, m<br>1.55, 1H, m                          | 40.4                      | 1, 2, 4, 5, 6     | 2, 4              |
| 4—CH <sub><math>\gamma</math></sub>    | 1.49, 1H, m                                         | 24.5                      | 3, 5, 6           | 3                 |
| 5—CH <sub><math>\delta</math>,1</sub>  | 0.88, 3H, d, 6.5                                    | 22.3                      | 3, 4, 6           | 4                 |
| 6—CH <sub><math>\delta</math>,2</sub>  | 0.85, 3H, d, 6.5                                    | 22.5                      | 3, 4, 5           | 4                 |
| 7—NH                                   | 7.73, 1H, d, 6.5                                    | —                         | (1), 2, 3, 8      | 2                 |
| <i>Leu</i> <sup>2</sup>                |                                                     |                           |                   |                   |
| 8—CO                                   | —                                                   | 171.0                     | —                 |                   |
| 9—CH <sub><math>\alpha</math></sub>    | 4.26, 1H, q, 8.0                                    | 50.4                      | 8, 10, 11         | 10                |
| 10—CH <sub><math>\beta</math></sub>    | 1.49, 2H, m                                         | 38.8                      | 9, 11, 12, 13     | 9, 11             |
| 11—CH <sub><math>\gamma</math></sub>   | 1.53, 1H, m                                         | 24.2                      | (9), 10, 12, 13   | 10                |
| 12—CH <sub><math>\delta</math>,1</sub> | 0.87, 3H, d, 6.5                                    | 22.9                      | 10, 11, 13        | 11                |
| 13—CH <sub><math>\delta</math>,2</sub> | 0.80, 3H, d, 6.5                                    | 21.4                      | 10, 11, 12        | 11                |
| 14—NH                                  | 8.11, 1H, d, 8.5                                    | —                         | 9, (10), 15       | 9                 |
| <i>L-allo-Thr</i> <sup>1</sup>         |                                                     |                           |                   |                   |
| 15—CO                                  | —                                                   | 170.7                     | —                 |                   |
| 16—CH <sub><math>\alpha</math></sub>   | 3.86, 1H, m                                         | 59.9                      | 15, 17, (18), 20  | 17                |
| 17—CH <sub><math>\beta</math></sub>    | 3.88, 1H, m                                         | 65.1                      | 16                | 16, 18            |
| 17—OH                                  | 4.69, 1H, d, 4.6                                    | —                         | 16, 17, 18        | 17                |
| 18—CH <sub><math>\gamma</math></sub>   | 1.03, 3H, d, 6.0                                    | 20.1                      | 16, 17            | 17                |
| 19—NH                                  | 8.09, 1H, d, 6.0                                    | —                         | 16, 17, 20        | 16                |
| <i>D-Ser</i>                           |                                                     |                           |                   |                   |
| 20—CO                                  | —                                                   | 170.0                     | —                 |                   |
| 21—CH <sub><math>\alpha</math></sub>   | 4.38, 1H, m                                         | 54.6                      | 20, 22, (24)      | 22                |
| 22—CH <sub><math>\beta</math></sub>    | 3.54, 2H, m                                         | 61.5                      | 20, 21            | 21                |
| 22—OH                                  | 4.86, 1H, t, 6.0                                    | —                         | 21, 22            | 22                |
| 23—NH                                  | 7.53, 1H, d, 8.0                                    | —                         | (20), 21, 22, 24  | 21                |
| <i>L-allo-Thr</i> <sup>2</sup>         |                                                     |                           |                   |                   |
| 24—CO                                  | —                                                   | 168.4                     | —                 |                   |
| 25—CH <sub><math>\alpha</math></sub>   | 4.39, 1H, d, 9.0                                    | 56.2                      | 24, 26, 27, 29    |                   |
| 26—CH <sub><math>\beta</math></sub>    | 5.34, 1H, qd, 6.0, <1                               | 69.6                      | 1, 24, 27         | 27                |
| 27—CH <sub><math>\gamma</math></sub>   | 1.10, 3H, d, 6.5                                    | 17.0                      | 25, 26            | 26                |
| 28—NH                                  | 8.39, 1H, d, 9.5                                    | —                         | 25, (26), 29      | 25                |
| <i>Leu</i> <sup>3</sup>                |                                                     |                           |                   |                   |
| 29—CO                                  | —                                                   | 173.2                     | —                 |                   |
| 30—CH <sub><math>\alpha</math></sub>   | 4.37, 1H, m                                         | 51.8                      | 29, 31, 32, 36    | 31                |
| 31—CH <sub><math>\beta</math></sub>    | 1.48, 2H, m                                         | 40.2                      | 29, 30, 32, 33    | 30                |
| 32—CH <sub><math>\gamma</math></sub>   | 1.62, 1H, m                                         | 24.2                      | 31, 33            | 31, 33, 34        |
| 33—CH <sub><math>\delta</math>,1</sub> | 0.92, 3H, d, 6.5                                    | 22.6                      | 31, 32, 34        | 32                |
| 34—CH <sub><math>\delta</math>,2</sub> | 0.87, 3H, d, 6.5                                    | 21.9                      | 31, 32, 33        | 32                |
| 35—NH                                  | 8.20, 1H, d, 6.5                                    | —                         | (29), 30, 31, 36  | 30                |
| <i>Fatty acid</i>                      |                                                     |                           |                   |                   |

Table S2. Cont.

|       |                                                |       |            |        |
|-------|------------------------------------------------|-------|------------|--------|
| 36—CO | —                                              | 171.9 | —          |        |
| 37    | 2.24, 1H, dd, 14.0, 6.0<br>2.22, dd, 14.0, 7.0 | 43.4  | 36, 38, 39 | 38     |
| 38    | 3.77, 1H, m                                    | 67.5  | 36, 40     | 37, 39 |
| 38—OH | 4.60, 1H, d, 5.0                               | —     | 37, 38, 39 | 38     |
| 39    | 1.31, 2H, m                                    | 36.6  | 37, 38, 41 | 38, 40 |
| 40    | 1.34, 1H, m<br>1.22, 1H, m                     | 24.8  |            |        |
| 41    | 1.23, 2H, m                                    | ~29   |            |        |
| 42    | ~1.2, 2H, m                                    | ~29   |            |        |
| 43    | ~1.2, 2H, m                                    | ~29   |            |        |
| 44    | ~1.2, 2H, m                                    | ~29   |            |        |
| 45    | ~1.2, 2H, m                                    | ~29   |            |        |
| 46    | 1.21, 2H, m                                    | 29.1  |            |        |
| 47    | 1.22, 2H, m                                    | 31.3  |            | 46, 48 |
| 48    | 1.25, 2H, m                                    | 22.1  | 47, 49     | 47, 49 |
| 49    | 0.84, 3H, t, 7.0                               | 13.9  | 47, 48     | 48     |

Table S3. NMR table for ngercheumicin H.

| Position, Type                         | $\delta_H$ (ppm), #H, Multiplicity, $J$ (Hz) | $\delta_C$ (ppm) | HMBC Connectivity | H2BC Connectivity |
|----------------------------------------|----------------------------------------------|------------------|-------------------|-------------------|
| <i>Leu</i> <sup>1</sup>                |                                              |                  |                   |                   |
| 1—CO                                   | —                                            | 170.8            | —                 |                   |
| 2—CH <sub><math>\alpha</math></sub>    | 4.37, 1H, m                                  | 51.1             | 1, 3, 4, 8        |                   |
| 3—CH <sub><math>\beta</math></sub>     | 1.62, 1H, m<br>1.56, 1H, m                   | 40.4             | 1, 2, 4, 5, 6     |                   |
| 4—CH <sub><math>\gamma</math></sub>    | 1.50, 1H, m                                  | 24.5             | 2, 3, 5, 6        |                   |
| 5—CH <sub><math>\delta,1</math></sub>  | 0.89, 3H, d, 6.5                             | 22.3             | 3, 4, 6           | 4                 |
| 6—CH <sub><math>\delta,2</math></sub>  | 0.85, 3H, d, 6.5                             | 22.5             | 3, 4, 5           | 4                 |
| 7—NH                                   | 7.73, 1H, d, 6.5                             | —                | (1), 2, 3, 8      | 2                 |
| <i>Leu</i> <sup>2</sup>                |                                              |                  |                   |                   |
| 8—CO                                   | —                                            | 171.0            | —                 |                   |
| 9—CH <sub><math>\alpha</math></sub>    | 4.25, 1H, q, 8.0                             | 50.4             | 8, 10, 11         | 10                |
| 10—CH <sub><math>\beta</math></sub>    | 1.49, 2H, m                                  | 38.8             | 9, 11, 13         | 9, 11             |
| 11—CH <sub><math>\gamma</math></sub>   | 1.54, 1H, m                                  | 24.1             | 9, 10, 13         | 10                |
| 12—CH <sub><math>\delta,1</math></sub> | 0.87, 3H, d, 6.5                             | 22.9             | 10, 11, 13        | 11                |
| 13—CH <sub><math>\delta,2</math></sub> | 0.80, 3H, d, 6.5                             | 21.4             | 10, 11, 12        | 11                |
| 14—NH                                  | 8.11, 1H, d, 8.5                             | —                | 9, 10, 15         | 9                 |
| <i>L-allo-Thr</i> <sup>1</sup>         |                                              |                  |                   |                   |
| 15—CO                                  | —                                            | 170.7            | —                 |                   |
| 16—CH <sub><math>\alpha</math></sub>   | 3.86, 1H, m                                  | 59.9             | 15, 17, 18, 20    | 17                |
| 17—CH <sub><math>\beta</math></sub>    | 3.88, 1H, m                                  | 65.1             | 16                | 16, 18            |
| 17—OH                                  | 4.69, 1H, d, 4.6                             | —                | 16, 17, 18        | 17                |
| 18—CH <sub><math>\gamma</math></sub>   | 1.03, 3H, d, 6.0                             | 20.1             | 16, 17            | 17                |
| 19—NH                                  | 8.09, 1H, d, 6.0                             | —                | 16, 17, 20        | 16                |
| <i>D-Ser</i>                           |                                              |                  |                   |                   |

Table S3. Cont.

|                                |                                                    |       |                  |        |
|--------------------------------|----------------------------------------------------|-------|------------------|--------|
| 20—CO                          | —                                                  | 170.0 | —                |        |
| 21—CH <sub>α</sub>             | 4.38, 1H, m                                        | 54.5  | 20, 22, 24       | 22     |
| 22—CH <sub>β</sub>             | 3.54, 2H, m                                        | 61.5  | 20, 21           | 21     |
| 22—OH                          | 4.86, 1H, t, 6.0                                   | —     | 21, 22           | 22     |
| 23—NH                          | 7.53, 1H, d, 8.0                                   | —     | (20), 21, 22, 24 | 21     |
| <i>L-allo-Thr</i> <sup>2</sup> |                                                    |       |                  |        |
| 24—CO                          | —                                                  | 168.4 | —                |        |
| 25—CH <sub>α</sub>             | 4.39, 1H, d, 9.0                                   | 56.2  | 24, 26, 27, 29   |        |
| 26—CH <sub>β</sub>             | 5.34, 1H, qd, 6.0, <1                              | 69.6  | 1, 24, 27        | 27     |
| 27—CH <sub>γ</sub>             | 1.10, 3H, d, 6.5                                   | 16.9  | 25, 26           | 26     |
| 28—NH                          | 8.39, 1H, d, 9.5                                   |       | 25, 26, 29       | 25     |
| <i>Leu</i> <sup>3</sup>        |                                                    |       |                  |        |
| 29—CO                          | —                                                  | 173.1 | —                |        |
| 30—CH <sub>α</sub>             | 4.37, 1H, m                                        | 51.8  | 29, 31, 32, 36   | 31     |
| 31—CH <sub>β</sub>             | 1.48, 2H, m                                        | 40.2  | 29, 30, 32, 33   | 30     |
| 32—CH <sub>γ</sub>             | 1.62, 1H, m                                        | 24.2  | 30, 31, 34       | 31     |
| 33—CH <sub>δ,1</sub>           | 0.91, 3H, d, 6.5                                   | 22.6  | 31, 32, 34       | 32     |
| 34—CH <sub>δ,2</sub>           | 0.87, 3H, d, 6.5                                   | 21.9  | 31, 32, 33       | 32     |
| 35—NH                          | 8.20, 1H, d, 6.5                                   | —     | (29), 30, 31, 36 | 30     |
| <i>Fatty acid</i>              |                                                    |       |                  |        |
| 36—CO                          | —                                                  | 171.9 | —                |        |
| 37                             | 2.25, 1H, dd, 14.0, 6.0<br>2.22, 1H, dd, 14.0, 7.0 | 43.4  | 36, 38, 39       | 38     |
| 38                             | 3.78, 1H, m                                        | 67.5  | 36, 40           | 37, 39 |
| 38—OH                          | 4.60, 1H, d, 5.0                                   | —     | 37, 38, 39       | 38     |
| 39                             | 1.32, 2H, m                                        | 36.6  | 38, 41           | 38, 40 |
| 40                             | 1.36, 1H, m                                        | 24.8  |                  | 39     |
|                                | 1.23, 1H, m                                        |       |                  |        |
| 41                             | ~1.2, 2H, m                                        | ~29   |                  |        |
| 42                             | 1.28, 2H, m                                        | ~29   | 44/45            | 43     |
| 43                             | 1.97, 2H, m                                        | 26.6  | 41?              | 42, 44 |
| 44                             | 5.31, 1H, m                                        | 129.6 | 43/46            | 43, 45 |
| 45                             | 5.31, 1H, m                                        | 129.6 | 43/46            | 44, 46 |
| 46                             | 1.97, 2H, m                                        | 26.6  | 48               | 45, 47 |
| 47                             | 1.28, 2H, m                                        | ~29   | 44/45            | 46     |
| 48                             | 1.25, 2H, m                                        | 28.2  |                  |        |
| 49                             | 1.22, 2H, m                                        | 31.1  | 47, (51)         | 48, 50 |
| 50                             | 1.25, 2H, m                                        | 22.0  | 48, 49, 51       | 49, 51 |
| 51                             | 0.84, 3H, t, 7.0                                   | 13.9  | 49, 50           | 50     |

Table S4. NMR table for ngercheumicin I.

| Position, Type                         | $\delta_H$ (ppm), #H, Multiplicity, J (Hz) | $\delta_C$ (ppm) | HMBC Connectivity | H2BC Connectivity |
|----------------------------------------|--------------------------------------------|------------------|-------------------|-------------------|
| <i>Leu</i> <sup>1</sup>                |                                            |                  |                   |                   |
| 1—CO                                   | —                                          | 170.8            | —                 |                   |
| 2—CH <sub><math>\alpha</math></sub>    | 4.37, 1H, m                                | 51.1             | 1, 3, 4, 8        |                   |
| 3—CH <sub><math>\beta</math></sub>     | 1.61, 1H, m<br>1.56, 1H, m                 | 40.4             | 1, 2, 4, 5, 6     |                   |
| 4—CH <sub><math>\gamma</math></sub>    | 1.49, 1H, m                                | 24.5             | 2, 3, 5, 6        |                   |
| 5—CH <sub><math>\delta,1</math></sub>  | 0.88, 3H, d, 6.5                           | 22.3             | 3, 4, 6           | 4                 |
| 6—CH <sub><math>\delta,2</math></sub>  | 0.85, 3H, d, 6.5                           | 22.5             | 3, 4, 5           | 4                 |
| 7—NH                                   | 7.73, 1H, d, 6.5                           | —                | (1), 2, 3, 8      | 2                 |
| <i>Leu</i> <sup>2</sup>                |                                            |                  |                   |                   |
| 8—CO                                   | —                                          | 171.0            | —                 |                   |
| 9—CH <sub><math>\alpha</math></sub>    | 4.26, 1H, q, 8.0                           | 50.4             | 8, 10, 11         | 10                |
| 10—CH <sub><math>\beta</math></sub>    | 1.49, 2H, m                                | 38.8             | 9, 11, 13         | 9, 11             |
| 11—CH <sub><math>\gamma</math></sub>   | 1.54, 1H, m                                | 24.1             | 9, 10, 13         | 10                |
| 12—CH <sub><math>\delta,1</math></sub> | 0.87, 3H, d, 6.5                           | 22.9             | 10, 11, 13        | 11                |
| 13—CH <sub><math>\delta,2</math></sub> | 0.80, 3H, d, 6.5                           | 21.4             | 10, 11, 12        | 11                |
| 14—NH                                  | 8.11, 1H, d, 8.5                           | —                | 9, 10, 15         | 9                 |
| <i>L-allo-Thr</i> <sup>1</sup>         |                                            |                  |                   |                   |
| 15—CO                                  | —                                          | 170.7            | —                 |                   |
| 16—CH <sub><math>\alpha</math></sub>   | 3.86, 1H, m                                | 59.9             | 15, 17, 18, 20    | 17                |
| 17—CH <sub><math>\beta</math></sub>    | 3.87, 1H, m                                | 65.1             | 16                | 16, 18            |
| 17—OH                                  | 4.69, 1H, d, 4.6                           | —                | 16, 17, 18        | 17                |
| 18—CH <sub><math>\gamma</math></sub>   | 1.03, 3H, d, 6.0                           | 20.1             | 16, 17            | 17                |
| 19—NH                                  | 8.09, 1H, d, 6.0                           | —                | 16, 17, 20        | 16                |
| <i>D-Ser</i>                           |                                            |                  |                   |                   |
| 20—CO                                  | —                                          | 170.0            | —                 |                   |
| 21—CH <sub><math>\alpha</math></sub>   | 4.38, 1H, m                                | 54.5             | 20, 22, 24        | 22                |
| 22—CH <sub><math>\beta</math></sub>    | 3.54, 2H, m                                | 61.5             | 20, 21            | 21                |
| 22—OH                                  | 4.86, 1H, t, 6.0                           | —                | 21, 22            | 22                |
| 23—NH                                  | 7.53, 1H, d, 8.0                           | —                | (20), 21, 22, 24  | 21                |
| <i>L-allo-Thr</i> <sup>2</sup>         |                                            |                  |                   |                   |
| 24—CO                                  | —                                          | 168.4            | —                 |                   |
| 25—CH <sub><math>\alpha</math></sub>   | 4.39, 1H, d, 9.0                           | 56.2             | 24, 26, 27, 29    |                   |
| 26—CH <sub><math>\beta</math></sub>    | 5.35, 1H, qd, 6.0, <1                      | 69.6             | 1, 24, 27         | 27                |
| 27—CH <sub><math>\gamma</math></sub>   | 1.10, 3H, d, 6.5                           | 17.0             | 25, 26            | 26                |
| 28—NH                                  | 8.39, 1H, d, 9.5                           | —                | 25, 26, 29        | 25                |
| <i>Leu</i> <sup>3</sup>                |                                            |                  |                   |                   |
| 29—CO                                  | —                                          | 173.2            | —                 |                   |
| 30—CH <sub><math>\alpha</math></sub>   | 4.37, 1H, m                                | 51.8             | 29, 31, 32, 36    | 31                |
| 31—CH <sub><math>\beta</math></sub>    | 1.48, 2H, m                                | 40.2             | 29, 30, 32, 33    | 30                |
| 32—CH <sub><math>\gamma</math></sub>   | 1.63, 1H, m                                | 24.2             | 30, 31, 34        |                   |
| 33—CH <sub><math>\delta,1</math></sub> | 0.92, 3H, d, 6.5                           | 22.6             | 31, 32, 34        | 32                |

Table S4. Cont.

|                      |                                                       |       |                  |        |
|----------------------|-------------------------------------------------------|-------|------------------|--------|
| 34—CH <sub>δ,2</sub> | 0.87, 3H, d, 6.5                                      | 21.9  | 31, 32, 33       | 32     |
| 35—NH                | 8.20, 1H, d, 6.5                                      | —     | (29), 30, 31, 36 | 30     |
| <i>Fatty acid</i>    |                                                       |       |                  |        |
| 36—CO                | —                                                     | 171.9 | —                |        |
| 37                   | 2.25, 1H, dd, 14.0, 7.0<br>2.22, 1H, dd,<br>14.0, 6.0 | 43.4  | 36, 38, 39       | 38     |
| 38                   | 3.78, 1H, m                                           | 67.5  | 36, 40           | 37, 39 |
| 38—OH                | 4.59, 1H, d, 5.0                                      | —     | 37, 38, 39       | 38     |
| 39                   | 1.32, 2H, m                                           | 36.6  | 38, 41           | 38, 40 |
| 40                   | 1.35, 1H, m                                           | 24.8  |                  |        |
|                      | 1.22, 1H, m                                           |       |                  |        |
| 41                   | 1.23, 2H, m                                           | 29.1  |                  |        |
| 42                   | ~1.2, 2H, m                                           | ~29   |                  |        |
| 43                   | ~1.2, 2H, m                                           | ~29   |                  |        |
| 44                   | ~1.2, 2H, m                                           | ~29   |                  |        |
| 45                   | ~1.2, 2H, m                                           | ~29   |                  |        |
| 46                   | ~1.2, 2H, m                                           | ~29   |                  |        |
| 47                   | ~1.2, 2H, m                                           | ~29   |                  |        |
| 48                   | ~1.2, 2H, m                                           | ~29   |                  |        |
| 49                   | 1.22, 2H, m                                           | 31.3  |                  | 48, 50 |
| 50                   | 1.25, 2H, m                                           | 22.1  | 48, 49, 51       | 49, 51 |
| 51                   | 0.84, 3H, t, 7.0                                      | 13.9  | 49, 50           | 50     |
